# Supplementary material
Source: HighWire-hosted journal article supplement (https://www.highwirestage.com/highwire/filestream/71586/field_highwire_adjunct_files/0/19-00759.pdf)
Supplement: 19-00759.pdf [file 19-00759.pdf]

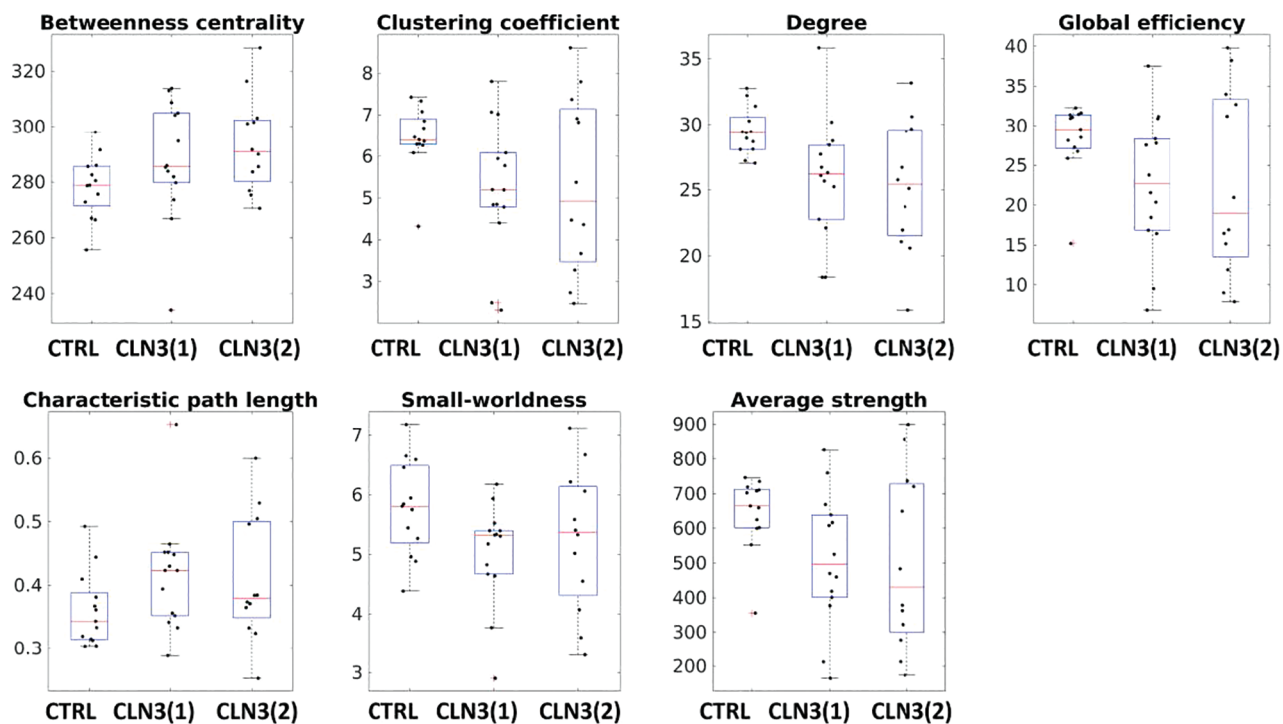

**ON-LINE FIG 1.** A boxplot of the global graph theoretical properties for the first and second acquisition of patients with CLN3 and the control subjects. Statistically significant differences (Bonferroni corrected) were found in the characteristic path length and degree, both for the first and second acquisition compared with control subjects.

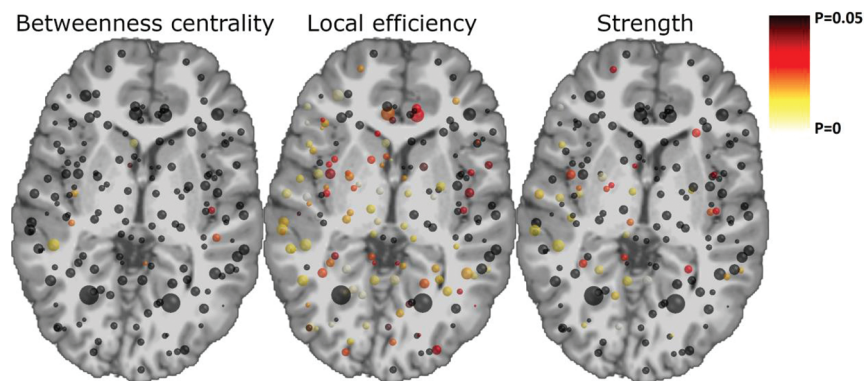

**ON-LINE FIG 2.** Local differences in betweenness centrality, local efficiency, and strength between the first acquisition of the patients with CLN3 and the control subjects. The size of the nodes illustrates the volume of the gray matter region, and the color indicates the statistical significance of the differences (P values).

Colour legend:

|                                              |
|----------------------------------------------|
| P<0.05                                       |
| P<0.01                                       |
| P<0.000305 (Bonferroni corrected P<0.05/164) |

### CLN3 1st acquisition vs control subjects

| Idx | Label name                      | Betweenness centrality |         |       | Local efficiency |               |       | Strength  |           |         |
|-----|---------------------------------|------------------------|---------|-------|------------------|---------------|-------|-----------|-----------|---------|
|     |                                 | CLN3 1st               | CON     | P     | CLN3 1st         | CON           | P     | CLN3 1st  | CON       | P       |
| 1   | Left-Cerebellum-Cortex          | 722±294                | 841±433 | 0,630 | 0.0085±0.0031    | 0.01±0.0052   | 0,215 | 3143±1662 | 2194±1097 | 0,311   |
| 2   | Left-Thalamus-Proper            | 789±417                | 750±388 | 0,722 | 0.0091±0.0047    | 0.0123±0.0052 | 0,097 | 1740±621  | 1848±655  | 0,485   |
| 3   | Left-Caudate                    | 619±369                | 502±292 | 0,323 | 0.0077±0.0049    | 0.0105±0.0041 | 0,046 | 849±649   | 911±342   | 0,322   |
| 4   | Left-Putamen                    | 700±430                | 568±338 | 0,315 | 0.0103±0.0055    | 0.0151±0.0052 | 0,012 | 2278±1299 | 2637±688  | 0,121   |
| 5   | Left-Pallidum                   | 410±285                | 415±208 | 0,769 | 0.0093±0.0057    | 0.0111±0.0034 | 0,173 | 948±580   | 852±338   | 0,701   |
| 6   | Left-Hippocampus                | 650±466                | 534±396 | 0,902 | 0.0062±0.0026    | 0.0079±0.0031 | 0,056 | 1757±336  | 728±251   | 0,226   |
| 7   | Left-Amygdala                   | 146±154                | 151±104 | 0,737 | 0.0029±0.0018    | 0.0052±0.0022 | 0,002 | 173±53    | 116±75    | 0,195   |
| 8   | Left-Accumbens-area             | 284±237                | 366±334 | 0,529 | 0.0044±0.0027    | 0.0061±0.0038 | 0,164 | 182±144   | 213±118   | 0,602   |
| 9   | Right-Cerebellum-Cortex         | 1137±563               | 748±476 | 0,162 | 0.0076±0.003     | 0.01±0.0048   | 0,087 | 2916±1524 | 2128±1224 | 0,497   |
| 10  | Right-Thalamus-Proper           | 443±319                | 616±454 | 0,174 | 0.0089±0.0041    | 0.0138±0.0058 | 0,012 | 1693±1043 | 1993±483  | 0,134   |
| 11  | Right-Caudate                   | 436±343                | 400±344 | 0,687 | 0.0076±0.0043    | 0.0111±0.0046 | 0,028 | 1837±469  | 842±341   | 0,534   |
| 12  | Right-Putamen                   | 954±410                | 799±472 | 0,399 | 0.0097±0.0057    | 0.0164±0.008  | 0,021 | 2180±955  | 3254±890  | 0,004   |
| 13  | Right-Pallidum                  | 338±205                | 348±301 | 0,958 | 0.0078±0.0035    | 0.0142±0.0063 | 0,003 | 759±333   | 1037±390  | 0,031   |
| 14  | Right-Hippocampus               | 585±394                | 343±238 | 0,090 | 0.0052±0.0017    | 0.0097±0.0066 | 0,017 | 564±425   | 762±393   | 0,072   |
| 15  | Right-Amygdala                  | 238±274                | 425±310 | 0,129 | 0.0035±0.0019    | 0.0061±0.0051 | 0,026 | 103±72    | 202±192   | 0,027   |
| 16  | Right-Accumbens-area            | 218±227                | 364±341 | 0,046 | 0.0084±0.0019    | 0.0067±0.0046 | 0,020 | 139±121   | 301±411   | 0,035   |
| 17  | ctx_lh_G_and_S_frontomargin     | 352±294                | 198±223 | 0,070 | 0.0079±0.006     | 0.0099±0.0046 | 0,228 | 612±558   | 622±672   | 0,731   |
| 18  | ctx_lh_G_and_S_occipital_inf    | 181±173                | 188±149 | 0,760 | 0.0069±0.0038    | 0.0082±0.004  | 0,468 | 534±622   | 470±379   | 0,581   |
| 19  | ctx_lh_G_and_S_paracentral      | 374±274                | 346±281 | 0,593 | 0.0054±0.0028    | 0.0095±0.0044 | 0,010 | 509±431   | 688±374   | 0,183   |
| 20  | ctx_lh_G_and_S_subcentral       | 127±147                | 202±223 | 0,201 | 0.0084±0.0057    | 0.0107±0.006  | 0,142 | 572±400   | 511±210   | 0,816   |
| 21  | ctx_lh_G_and_S_transv_frontopol | 211±178                | 155±154 | 0,605 | 0.0076±0.0042    | 0.0095±0.0047 | 0,159 | 559±523   | 454±418   | 0,931   |
| 22  | ctx_lh_G_and_S_cingul-Ant       | 217±215                | 282±227 | 0,173 | 0.0054±0.0023    | 0.0093±0.0055 | 0,031 | 382±311   | 576±357   | 0,144   |
| 23  | ctx_lh_G_and_S_cingul-Mid-Ant   | 150±118                | 224±184 | 0,157 | 0.0059±0.0036    | 0.0082±0.0038 | 0,050 | 398±222   | 388±237   | 0,502   |
| 24  | ctx_lh_G_and_S_cingul-Mid-Post  | 161±119                | 100±89  | 0,633 | 0.0047±0.0024    | 0.0078±0.0038 | 0,009 | 260±138   | 254±130   | 0,689   |
| 25  | ctx_lh_G_cingul-Post-dorsal     | 227±153                | 204±130 | 0,878 | 0.0033±0.0018    | 0.0044±0.002  | 0,135 | 123±75    | 109±77    | 0,875   |
| 26  | ctx_lh_G_cingul-Post-ventral    | 353±279                | 181±148 | 0,022 | 0.0032±0.0017    | 0.006±0.0038  | 0,036 | 148±121   | 213±158   | 0,548   |
| 27  | ctx_lh_G_cuneus                 | 299±193                | 280±140 | 0,959 | 0.0044±0.0022    | 0.0062±0.0034 | 0,047 | 307±146   | 368±213   | 0,139   |
| 28  | ctx_lh_G_front_inf-Opercular    | 174±174                | 167±88  | 0,874 | 0.0083±0.0056    | 0.0116±0.0046 | 0,040 | 831±819   | 833±342   | 0,681   |
| 29  | ctx_lh_G_front_inf-Orbital      | 147±170                | 215±269 | 0,225 | 0.0049±0.0027    | 0.0067±0.0032 | 0,200 | 198±282   | 227±148   | 0,452   |
| 30  | ctx_lh_G_front_inf-Triangul     | 349±163                | 307±184 | 0,903 | 0.0077±0.0047    | 0.0096±0.0041 | 0,116 | 645±583   | 637±333   | 0,428   |
| 31  | ctx_lh_G_front_middle           | 336±295                | 221±155 | 0,262 | 0.0128±0.0094    | 0.0161±0.0057 | 0,171 | 1334±758  | 1682±745  | 0,294   |
| 32  | ctx_lh_G_front_sup              | 824±323                | 830±349 | 0,637 | 0.011±0.0065     | 0.0153±0.0049 | 0,031 | 3748±2198 | 4799±1763 | 0,085   |
| 33  | ctx_lh_G_ins_lg_and_S_cent_ins  | 202±156                | 189±167 | 0,703 | 0.0047±0.0027    | 0.006±0.0026  | 0,280 | 199±150   | 185±127   | 0,744   |
| 34  | ctx_lh_G_insular_short          | 343±215                | 244±201 | 0,198 | 0.0052±0.003     | 0.0077±0.0041 | 0,057 | 243±182   | 387±200   | 0,039   |
| 35  | ctx_lh_G_occipital_middle       | 285±213                | 235±166 | 0,351 | 0.0073±0.0035    | 0.0102±0.0042 | 0,035 | 1019±893  | 856±349   | 0,790   |
| 36  | ctx_lh_G_occipital_sup          | 326±196                | 347±259 | 0,603 | 0.0046±0.0021    | 0.0072±0.0035 | 0,024 | 393±331   | 447±207   | 0,618   |
| 37  | ctx_lh_G_oc-temp_lat-fusifor    | 207±166                | 178±156 | 0,975 | 0.0055±0.002     | 0.0089±0.0041 | 0,015 | 335±239   | 537±255   | 0,064   |
| 38  | ctx_lh_G_oc-temp_med-Lingual    | 379±235                | 441±318 | 0,594 | 0.0044±0.0016    | 0.0071±0.0031 | 0,017 | 417±355   | 598±287   | 0,158   |
| 39  | ctx_lh_G_oc-temp_med-Parahip    | 358±233                | 365±202 | 0,498 | 0.005±0.0025     | 0.0064±0.0027 | 0,067 | 327±207   | 324±130   | 0,435   |
| 40  | ctx_lh_G_orbital                | 481±332                | 515±198 | 0,579 | 0.0084±0.0053    | 0.0105±0.0049 | 0,303 | 1034±506  | 1262±596  | 0,453   |
| 41  | ctx_lh_G_pariet_inf-Angular     | 234±190                | 305±238 | 0,578 | 0.0096±0.0056    | 0.0118±0.0038 | 0,265 | 1115±646  | 961±392   | 0,284   |
| 42  | ctx_lh_G_pariet_inf-Supramar    | 74±73                  | 126±118 | 0,083 | 0.0107±0.0062    | 0.0147±0.005  | 0,086 | 971±626   | 1259±714  | 0,194   |
| 43  | ctx_lh_G_parietal_sup           | 633±415                | 718±286 | 0,683 | 0.0065±0.0033    | 0.0101±0.0045 | 0,024 | 980±647   | 1478±607  | 0,053   |
| 44  | ctx_lh_G_postcentral            | 344±314                | 310±212 | 0,520 | 0.0091±0.0053    | 0.0124±0.0054 | 0,101 | 1802±434  | 1020±422  | 0,076   |
| 45  | ctx_lh_G_precentral             | 381±225                | 392±352 | 0,547 | 0.0115±0.0062    | 0.0158±0.0044 | 0,039 | 1759±1177 | 1941±615  | 0,469   |
| 46  | ctx_lh_G_precuneus              | 617±476                | 543±589 | 0,778 | 0.0057±0.0024    | 0.0105±0.0053 | 0,005 | 706±347   | 1131±275  | 9,4E-04 |
| 47  | ctx_lh_G_rectus                 | 249±198                | 131±128 | 0,202 | 0.005±0.0029     | 0.0076±0.0047 | 0,273 | 238±165   | 333±360   | 0,810   |
| 48  | ctx_lh_G_subcallosal            | 271±252                | 205±250 | 0,615 | 0.0026±0.0013    | 0.0042±0.0027 | 0,073 | 180±80    | 89±63     | 0,733   |
| 49  | ctx_lh_G_temp_sup-G_T_transv    | 64±78                  | 69±76   | 0,890 | 0.0043±0.0031    | 0.0059±0.0027 | 0,296 | 177±70    | 103±91    | 0,656   |
| 50  | ctx_lh_G_temp_sup-Lateral       | 340±230                | 380±284 | 0,891 | 0.0079±0.004     | 0.0092±0.0031 | 0,231 | 1809±528  | 862±466   | 0,654   |
| 51  | ctx_lh_G_temp_sup-Plan_polar    | 260±166                | 359±224 | 0,150 | 0.0034±0.0025    | 0.0056±0.0025 | 0,058 | 102±82    | 280±314   | 0,153   |
| 52  | ctx_lh_G_temp_sup-Plan_tempo    | 96±104                 | 134±134 | 0,487 | 0.0057±0.0039    | 0.0098±0.003  | 0,008 | 176±121   | 352±228   | 0,017   |
| 53  | ctx_lh_G_temporal_inf           | 449±387                | 432±313 | 0,675 | 0.0077±0.0039    | 0.0117±0.0055 | 0,054 | 882±483   | 1324±704  | 0,137   |
| 54  | ctx_lh_G_temporal-middle        | 416±477                | 353±231 | 0,297 | 0.0092±0.0054    | 0.0119±0.004  | 0,098 | 1954±501  | 1476±721  | 0,058   |
| 55  | ctx_lh_Lat_Fis-ant-Horizont     | 41±33                  | 87±79   | 0,080 | 0.0034±0.0024    | 0.0046±0.0026 | 0,445 | 33±32     | 50±38     | 0,563   |
| 56  | ctx_lh_Lat_Fis-ant-Vertical     | 49±70                  | 92±94   | 0,210 | 0.0037±0.0032    | 0.006±0.0028  | 0,026 | 44±45     | 70±35     | 0,084   |
| 57  | ctx_lh_Lat_Fis-post             | 111±79                 | 61±63   | 0,064 | 0.0044±0.0026    | 0.0064±0.0035 | 0,014 | 181±330   | 115±59    | 0,926   |
| 58  | ctx_lh_Pole_occipital           | 245±293                | 324±218 | 0,431 | 0.0059±0.0034    | 0.007±0.0055  | 0,287 | 1479±373  | 417±379   | 0,550   |
| 59  | ctx_lh_Pole_temporal            | 517±274                | 658±386 | 0,161 | 0.0069±0.0037    | 0.0099±0.0049 | 0,096 | 1040±521  | 1373±630  | 0,261   |
| 60  | ctx_lh_S_calcarine              | 315±216                | 376±299 | 0,754 | 0.0047±0.0021    | 0.006±0.0033  | 0,140 | 404±187   | 309±195   | 0,554   |

ON-LINE FIG 3. Results of the local graph theoretical analyses in CLN3.



|     |                                  |         |          |       |               |               |       |           |           |       |
|-----|----------------------------------|---------|----------|-------|---------------|---------------|-------|-----------|-----------|-------|
| 61  | ctx_lh_S_central                 | 229±297 | 265±220  | 0,581 | 0.0064±0.0037 | 0.0088±0.0041 | 0,053 | 234±206   | 361±174   | 0,024 |
| 62  | ctx_lh_S_cingul-Marginalis       | 286±222 | 172±227  | 0,228 | 0.0042±0.0021 | 0.008±0.0047  | 0,013 | 232±221   | 307±243   | 0,546 |
| 63  | ctx_lh_S_circular_insula_ant     | 111±129 | 69±108   | 0,239 | 0.0043±0.0033 | 0.0053±0.0028 | 0,731 | 199±99    | 65±38     | 0,124 |
| 64  | ctx_lh_S_circular_insula_inf     | 360±280 | 229±123  | 0,037 | 0.0048±0.0026 | 0.0075±0.0041 | 0,036 | 209±104   | 326±147   | 0,031 |
| 65  | ctx_lh_S_circular_insula_sup     | 274±250 | 214±124  | 0,218 | 0.0049±0.0034 | 0.0059±0.0021 | 0,413 | 191±147   | 152±81    | 0,625 |
| 66  | ctx_lh_S_collat_transv_ant       | 164±153 | 340±270  | 0,049 | 0.0049±0.0031 | 0.0058±0.0025 | 0,544 | 199±129   | 231±146   | 0,612 |
| 67  | ctx_lh_S_collat_transv_post      | 48±58   | 103±144  | 0,345 | 0.0032±0.0018 | 0.007±0.0067  | 0,040 | 128±36    | 122±137   | 0,010 |
| 68  | ctx_lh_S_front_inf               | 166±166 | 90±113   | 0,142 | 0.0091±0.008  | 0.0109±0.006  | 0,137 | 305±357   | 242±147   | 0,698 |
| 69  | ctx_lh_S_front_middle            | 129±132 | 148±147  | 0,740 | 0.0063±0.0041 | 0.0096±0.004  | 0,018 | 140±100   | 239±334   | 0,572 |
| 70  | ctx_lh_S_front_sup               | 235±208 | 235±216  | 0,502 | 0.0109±0.0107 | 0.0144±0.0072 | 0,267 | 381±304   | 632±293   | 0,029 |
| 71  | ctx_lh_S_interm_prim-Jensen      | 33±37   | 37±74    | 0,780 | 0.0038±0.003  | 0.0083±0.0057 | 0,036 | 148±54    | 53±37     | 0,594 |
| 72  | ctx_lh_S_intrapariet_and_P_trans | 338±223 | 553±547  | 0,084 | 0.0055±0.0024 | 0.0079±0.0032 | 0,015 | 1400±206  | 583±301   | 0,084 |
| 73  | ctx_lh_S_oc_middle_and_Lunatus   | 183±220 | 209±159  | 0,749 | 0.0034±0.0031 | 0.0046±0.0023 | 0,174 | 138±158   | 113±70    | 0,940 |
| 74  | ctx_lh_S_oc_sup_and_transversal  | 434±567 | 256±158  | 0,053 | 0.0041±0.0018 | 0.006±0.0034  | 0,069 | 224±139   | 260±211   | 0,637 |
| 75  | ctx_lh_S_occipital_ant           | 54±49   | 72±54    | 0,486 | 0.005±0.0029  | 0.0063±0.0038 | 0,163 | 107±95    | 110±80    | 0,615 |
| 76  | ctx_lh_S_oc-temp_lat             | 144±173 | 176±161  | 0,925 | 0.0046±0.0022 | 0.0068±0.0033 | 0,037 | 164±146   | 202±143   | 0,253 |
| 77  | ctx_lh_S_oc-temp_med_and_Lingual | 373±396 | 252±268  | 0,314 | 0.0045±0.0021 | 0.008±0.0047  | 0,017 | 317±206   | 435±149   | 0,031 |
| 78  | ctx_lh_S_orbital_lateral         | 127±121 | 141±179  | 0,996 | 0.0052±0.0039 | 0.0056±0.0025 | 0,321 | 116±146   | 107±94    | 0,799 |
| 79  | ctx_lh_S_orbital_med-olfact      | 214±471 | 123±105  | 0,217 | 0.0036±0.0023 | 0.004±0.0022  | 0,819 | 87±70     | 66±44     | 0,575 |
| 80  | ctx_lh_S_orbital_H_Shaped        | 147±166 | 108±135  | 0,392 | 0.0048±0.0038 | 0.0068±0.0028 | 0,144 | 101±96    | 106±57    | 0,832 |
| 81  | ctx_lh_S_parieto_occipital       | 270±308 | 302±214  | 0,773 | 0.0045±0.0023 | 0.0064±0.0039 | 0,045 | 304±228   | 319±116   | 0,421 |
| 82  | ctx_lh_S_pericallosal            | 362±268 | 321±247  | 0,464 | 0.0038±0.0017 | 0.0058±0.0029 | 0,019 | 223±134   | 218±72    | 0,479 |
| 83  | ctx_lh_S_postcentral             | 122±107 | 260±181  | 0,025 | 0.0075±0.0039 | 0.0092±0.0042 | 0,230 | 349±171   | 385±133   | 0,256 |
| 84  | ctx_lh_S_precentral-inf-part     | 94±97   | 60±56    | 0,414 | 0.0065±0.0036 | 0.0106±0.0064 | 0,035 | 138±116   | 191±119   | 0,354 |
| 85  | ctx_lh_S_precentral-sup-part     | 72±89   | 125±156  | 0,071 | 0.0072±0.0058 | 0.0102±0.0027 | 0,093 | 109±110   | 228±121   | 0,012 |
| 86  | ctx_lh_S_suborbital              | 166±152 | 105±104  | 0,592 | 0.003±0.0015  | 0.0056±0.0042 | 0,107 | 180±76    | 151±216   | 0,630 |
| 87  | ctx_lh_S_subparietal             | 229±186 | 202±140  | 0,476 | 0.0036±0.0011 | 0.0061±0.004  | 0,017 | 225±202   | 246±170   | 0,308 |
| 88  | ctx_lh_S_temporal_inf            | 103±84  | 165±177  | 0,402 | 0.0046±0.0022 | 0.0084±0.005  | 0,009 | 111±79    | 311±277   | 0,017 |
| 89  | ctx_lh_S_temporal_sup            | 372±344 | 171±164  | 0,085 | 0.0072±0.0035 | 0.0101±0.0032 | 0,018 | 657±389   | 786±419   | 0,490 |
| 90  | ctx_lh_S_temporal_transverse     | 85±116  | 43±75    | 0,604 | 0.0036±0.0028 | 0.0039±0.0029 | 0,935 | 59±84     | 53±95     | 0,810 |
| 91  | ctx_rh_G_and_S_frontomargin      | 354±412 | 199±161  | 0,106 | 0.0069±0.004  | 0.0108±0.0046 | 0,019 | 1450±250  | 703±461   | 0,036 |
| 92  | ctx_rh_G_and_S_occipital_inf     | 169±184 | 181±173  | 0,972 | 0.0068±0.004  | 0.0099±0.0045 | 0,046 | 430±316   | 552±457   | 0,543 |
| 93  | ctx_rh_G_and_S_paracentral       | 234±208 | 286±165  | 0,771 | 0.0048±0.0025 | 0.0081±0.0041 | 0,005 | 265±201   | 473±287   | 0,023 |
| 94  | ctx_rh_G_and_S_subcentral        | 135±100 | 109±92   | 0,308 | 0.0062±0.0037 | 0.0106±0.006  | 0,011 | 285±143   | 370±224   | 0,059 |
| 95  | ctx_rh_G_and_S_transv_frontopol  | 340±334 | 237±278  | 0,370 | 0.0084±0.0053 | 0.0123±0.0059 | 0,068 | 1716±637  | 637±275   | 0,718 |
| 96  | ctx_rh_G_and_S_cingul-Ant        | 329±237 | 339±255  | 0,624 | 0.0064±0.0038 | 0.0101±0.0056 | 0,059 | 573±408   | 650±226   | 0,885 |
| 97  | ctx_rh_G_and_S_cingul-Mid-Ant    | 395±266 | 173±137  | 0,007 | 0.0053±0.0027 | 0.0102±0.0057 | 0,006 | 431±255   | 562±348   | 0,376 |
| 98  | ctx_rh_G_and_S_cingul-Mid-Post   | 291±310 | 311±232  | 0,878 | 0.0044±0.0015 | 0.0085±0.004  | 0,002 | 268±95    | 462±191   | 0,012 |
| 99  | ctx_rh_G_cingul-Post-dorsal      | 185±217 | 164±124  | 0,554 | 0.0033±0.0016 | 0.0055±0.0033 | 0,054 | 128±63    | 150±78    | 0,433 |
| 100 | ctx_rh_G_cingul-Post-ventral     | 221±301 | 212±174  | 0,820 | 0.0034±0.0023 | 0.0056±0.0031 | 0,029 | 144±129   | 234±131   | 0,135 |
| 101 | ctx_rh_G_cuneus                  | 400±262 | 588±328  | 0,170 | 0.0039±0.0015 | 0.0066±0.0035 | 0,007 | 246±145   | 432±171   | 0,001 |
| 102 | ctx_rh_G_front_inf-Opercular     | 193±154 | 155±119  | 0,777 | 0.0072±0.0054 | 0.0141±0.0059 | 0,010 | 486±322   | 1048±615  | 0,011 |
| 103 | ctx_rh_G_front_inf-Orbital       | 80±71   | 109±87   | 0,356 | 0.0043±0.0019 | 0.0079±0.0029 | 0,002 | 115±69    | 263±207   | 0,071 |
| 104 | ctx_rh_G_front_inf-Triangul      | 225±247 | 251±272  | 0,706 | 0.0064±0.0037 | 0.0126±0.0061 | 0,004 | 421±326   | 765±282   | 0,001 |
| 105 | ctx_rh_G_front_middle            | 420±302 | 360±213  | 0,637 | 0.0101±0.0054 | 0.0173±0.0064 | 0,004 | 1171±1379 | 1923±633  | 0,405 |
| 106 | ctx_rh_G_front_sup               | 837±542 | 1036±700 | 0,911 | 0.0104±0.0057 | 0.0154±0.0065 | 0,023 | 3363±2116 | 4862±1537 | 0,063 |
| 107 | ctx_rh_G_Ins_lg_and_S_cent_ins   | 179±121 | 205±219  | 0,828 | 0.004±0.0025  | 0.008±0.0052  | 0,020 | 117±85    | 295±241   | 0,023 |
| 108 | ctx_rh_G_insular_short           | 307±148 | 193±173  | 0,189 | 0.0053±0.0035 | 0.0108±0.007  | 0,031 | 296±222   | 527±287   | 0,060 |
| 109 | ctx_rh_G_occipital_middle        | 376±341 | 254±208  | 0,119 | 0.0077±0.0042 | 0.0129±0.0051 | 0,007 | 1094±872  | 1381±888  | 0,526 |
| 110 | ctx_rh_G_occipital_sup           | 368±325 | 608±321  | 0,213 | 0.0046±0.0022 | 0.0074±0.0031 | 0,012 | 1452±521  | 652±335   | 0,426 |
| 111 | ctx_rh_G_oc-temp_lat-fusifor     | 206±222 | 125±117  | 0,217 | 0.0058±0.0025 | 0.0088±0.0042 | 0,026 | 281±179   | 383±162   | 0,069 |
| 112 | ctx_rh_G_oc-temp_med-Lingual     | 641±416 | 395±305  | 0,078 | 0.0042±0.0012 | 0.008±0.0047  | 0,003 | 431±261   | 668±308   | 0,015 |
| 113 | ctx_rh_G_oc-temp_med-Parahip     | 343±288 | 362±240  | 0,712 | 0.0041±0.0015 | 0.0064±0.0031 | 0,018 | 234±255   | 302±168   | 0,431 |
| 114 | ctx_rh_G_orbital                 | 550±398 | 620±456  | 0,540 | 0.0075±0.0043 | 0.0106±0.0045 | 0,088 | 1014±543  | 1231±617  | 0,463 |
| 115 | ctx_rh_G_pariet_inf-Angular      | 254±280 | 227±140  | 0,954 | 0.0099±0.0059 | 0.0165±0.0061 | 0,013 | 1211±855  | 1834±775  | 0,053 |
| 116 | ctx_rh_G_pariet_inf-Supramar     | 156±183 | 127±127  | 0,832 | 0.0105±0.0055 | 0.0171±0.0078 | 0,016 | 1128±684  | 1216±634  | 0,315 |
| 117 | ctx_rh_G_parietal_sup            | 663±460 | 645±415  | 0,646 | 0.0055±0.0033 | 0.0106±0.0051 | 0,002 | 631±461   | 1080±398  | 0,009 |
| 118 | ctx_rh_G_postcentral             | 473±371 | 379±262  | 0,180 | 0.0069±0.0043 | 0.0136±0.0072 | 0,001 | 638±457   | 1063±472  | 0,010 |
| 119 | ctx_rh_G_precentral              | 400±315 | 405±369  | 1,000 | 0.0095±0.0048 | 0.0191±0.0106 | 0,008 | 1460±1051 | 2462±818  | 0,027 |
| 120 | ctx_rh_G_precuneus               | 480±387 | 459±223  | 0,629 | 0.0054±0.0026 | 0.0092±0.0044 | 0,010 | 664±378   | 1219±571  | 0,011 |
| 121 | ctx_rh_G_rectus                  | 230±236 | 250±180  | 0,246 | 0.0034±0.0022 | 0.0052±0.0026 | 0,043 | 89±76     | 150±146   | 0,115 |
| 122 | ctx_rh_G_subcallosal             | 204±148 | 208±275  | 0,763 | 0.0022±0.0009 | 0.0043±0.0029 | 0,007 | 62±49     | 136±190   | 0,118 |
| 123 | ctx_rh_G_temp_sup-G_T_transv     | 164±107 | 120±101  | 0,331 | 0.0035±0.0025 | 0.0071±0.0046 | 0,020 | 75±79     | 139±97    | 0,051 |
| 124 | ctx_rh_G_temp_sup-Lateral        | 672±809 | 415±281  | 0,065 | 0.0069±0.0036 | 0.0129±0.0073 | 0,008 | 171±338   | 1314±648  | 0,015 |
| 125 | ctx_rh_G_temp_sup-Plan_polar     | 363±159 | 307±208  | 0,306 | 0.0041±0.0028 | 0.0069±0.0035 | 0,050 | 185±142   | 331±202   | 0,077 |
| 126 | ctx_rh_G_temp_sup-Plan_tempo     | 82±76   | 68±65    | 0,540 | 0.0074±0.0051 | 0.0111±0.0049 | 0,034 | 240±184   | 283±98    | 0,278 |
| 127 | ctx_rh_G_temporal_inf            | 218±187 | 180±153  | 0,239 | 0.0083±0.0048 | 0.0126±0.0051 | 0,013 | 850±449   | 967±437   | 0,279 |
| 128 | ctx_rh_G_temporal_middle         | 220±156 | 351±285  | 0,333 | 0.0095±0.0051 | 0.016±0.0083  | 0,011 | 1537±786  | 2261±760  | 0,012 |
| 129 | ctx_rh_Lat_Fis-ant-Horizont      | 116±148 | 97±126   | 0,942 | 0.0034±0.0031 | 0.0061±0.0032 | 0,031 | 162±79    | 100±99    | 0,141 |
| 130 | ctx_rh_Lat_Fis-ant-Vertical      | 43±85   | 55±85    | 0,621 | 0.0033±0.0033 | 0.0069±0.0051 | 0,016 | 39±56     | 50±49     | 0,067 |

ON-LINE FIG 3. Continued

|     |                                  |         |         |       |               |               |         |         |          |       |
|-----|----------------------------------|---------|---------|-------|---------------|---------------|---------|---------|----------|-------|
| 131 | ctx_rh_Lat_Fis-post              | 144±88  | 84±70   | 0,022 | 0.0052±0.0032 | 0.007±0.0044  | 0,096   | 230±209 | 124±75   | 0,462 |
| 132 | ctx_rh_Pole_occipital            | 506±422 | 431±373 | 0,975 | 0.0057±0.0026 | 0.0081±0.0035 | 0,026   | 638±366 | 646±319  | 0,436 |
| 133 | ctx_rh_Pole_temporal             | 585±374 | 495±323 | 0,415 | 0.007±0.0038  | 0.0105±0.0059 | 0,039   | 918±490 | 1149±526 | 0,108 |
| 134 | ctx_rh_S_calcarine               | 396±221 | 437±305 | 0,376 | 0.0039±0.0012 | 0.0064±0.003  | 0,007   | 266±134 | 415±273  | 0,155 |
| 135 | ctx_rh_S_central                 | 174±117 | 253±140 | 0,017 | 0.0055±0.0039 | 0.01±0.0055   | 0,031   | 232±171 | 456±274  | 0,009 |
| 136 | ctx_rh_S_cingul-Marginalis       | 177±184 | 206±200 | 0,424 | 0.0045±0.0023 | 0.0075±0.0036 | 0,009   | 197±146 | 362±203  | 0,007 |
| 137 | ctx_rh_S_circular_insula_ant     | 135±146 | 44±34   | 0,493 | 0.0043±0.0037 | 0.0065±0.0028 | 0,169   | 101±103 | 99±96    | 0,897 |
| 138 | ctx_rh_S_circular_insula_inf     | 217±132 | 310±174 | 0,210 | 0.0052±0.0029 | 0.0081±0.0044 | 0,072   | 269±138 | 430±286  | 0,118 |
| 139 | ctx_rh_S_circular_insula_sup     | 191±129 | 179±135 | 0,792 | 0.0037±0.002  | 0.0064±0.0036 | 0,030   | 93±52   | 131±94   | 0,133 |
| 140 | ctx_rh_S_collat_transv_ant       | 75±85   | 115±146 | 0,245 | 0.0054±0.0034 | 0.0079±0.006  | 0,141   | 138±81  | 294±287  | 0,104 |
| 141 | ctx_rh_S_collat_transv_post      | 83±109  | 136±144 | 0,173 | 0.0037±0.0037 | 0.0046±0.003  | 0,246   | 51±51   | 61±43    | 0,388 |
| 142 | ctx_rh_S_front_inf               | 186±150 | 163±163 | 0,971 | 0.006±0.0033  | 0.0104±0.0066 | 0,017   | 300±283 | 237±168  | 0,762 |
| 143 | ctx_rh_S_front_middle            | 210±229 | 201±168 | 0,892 | 0.0082±0.0069 | 0.0114±0.0059 | 0,186   | 316±275 | 351±300  | 0,392 |
| 144 | ctx_rh_S_front_sup               | 222±211 | 292±361 | 0,378 | 0.0082±0.0053 | 0.013±0.0065  | 0,050   | 326±201 | 550±329  | 0,090 |
| 145 | ctx_rh_S_interm_prim-Jensen      | 41±54   | 20±31   | 0,428 | 0.0044±0.0019 | 0.0079±0.0043 | 0,012   | 66±101  | 45±26    | 0,745 |
| 146 | ctx_rh_S_intrapariet_and_P_trans | 298±242 | 340±258 | 0,886 | 0.0059±0.0044 | 0.0098±0.0056 | 0,022   | 389±353 | 605±386  | 0,028 |
| 147 | ctx_rh_S_oc_middle_and_Lunatus   | 129±204 | 124±81  | 0,594 | 0.0028±0.0017 | 0.0055±0.0033 | 0,008   | 71±74   | 119±125  | 0,260 |
| 148 | ctx_rh_S_oc_sup_and_transversal  | 239±194 | 436±447 | 0,679 | 0.0046±0.0022 | 0.0066±0.0038 | 0,003   | 100±63  | 321±348  | 0,010 |
| 149 | ctx_rh_S_occipital_ant           | 218±270 | 88±81   | 0,301 | 0.0047±0.0023 | 0.0091±0.0061 | 0,019   | 107±90  | 284±338  | 0,052 |
| 150 | ctx_rh_S_oc-temp_lat             | 45±67   | 140±194 | 0,140 | 0.0053±0.0031 | 0.0063±0.0027 | 0,404   | 92±72   | 126±140  | 0,326 |
| 151 | ctx_rh_S_oc-temp_med_and_Lingual | 190±186 | 181±135 | 0,379 | 0.0043±0.002  | 0.0062±0.0026 | 0,039   | 175±131 | 203±72   | 0,192 |
| 152 | ctx_rh_S_orbital_lateral         | 101±124 | 196±269 | 0,510 | 0.0042±0.0038 | 0.007±0.0044  | 0,066   | 83±91   | 171±146  | 0,143 |
| 153 | ctx_rh_S_orbital_med-olfact      | 176±201 | 118±123 | 0,852 | 0.003±0.002   | 0.0056±0.0039 | 0,032   | 75±50   | 128±92   | 0,071 |
| 154 | ctx_rh_S_orbital-H_Shaped        | 172±226 | 153±214 | 0,636 | 0.0053±0.0028 | 0.0071±0.0054 | 0,218   | 257±356 | 129±133  | 0,433 |
| 155 | ctx_rh_S_parieto_occipital       | 429±272 | 504±312 | 0,406 | 0.0041±0.0018 | 0.0068±0.0031 | 0,004   | 345±245 | 425±166  | 0,101 |
| 156 | ctx_rh_S_pericallosal            | 657±479 | 526±347 | 0,212 | 0.0046±0.0027 | 0.0079±0.0049 | 0,025   | 452±395 | 636±428  | 0,190 |
| 157 | ctx_rh_S_postcentral             | 283±259 | 275±159 | 0,942 | 0.0046±0.0021 | 0.0099±0.0046 | 9,4E-04 | 204±136 | 444±263  | 0,012 |
| 158 | ctx_rh_S_precentral-inf-part     | 73±89   | 71±69   | 0,663 | 0.0062±0.0036 | 0.012±0.0065  | 0,016   | 184±168 | 247±134  | 0,065 |
| 159 | ctx_rh_S_precentral-sup-part     | 79±94   | 193±316 | 0,080 | 0.0065±0.0044 | 0.0124±0.0079 | 0,027   | 152±112 | 289±292  | 0,072 |
| 160 | ctx_rh_S_suborbital              | 72±123  | 88±112  | 0,987 | 0.0024±0.0016 | 0.0031±0.0022 | 0,545   | 37±38   | 33±24    | 0,470 |
| 161 | ctx_rh_S_subparietal             | 183±151 | 221±171 | 0,992 | 0.0037±0.0027 | 0.0064±0.0029 | 0,025   | 165±138 | 344±241  | 0,028 |
| 162 | ctx_rh_S_temporal_inf            | 240±273 | 200±178 | 0,692 | 0.0054±0.0045 | 0.0087±0.0035 | 0,015   | 209±198 | 352±281  | 0,070 |
| 163 | ctx_rh_S_temporal_sup            | 346±229 | 220±158 | 0,013 | 0.0087±0.0048 | 0.0148±0.0065 | 0,010   | 813±374 | 1348±599 | 0,012 |
| 164 | ctx_rh_S_temporal_transverse     | 64±51   | 70±69   | 0,609 | 0.0036±0.0028 | 0.0062±0.004  | 0,047   | 50±43   | 77±50    | 0,141 |

### CLN3 2nd acquisition vs control subjects

| Idx | Label name                      | Betweenness centrality |         |       | Local efficiency |               |       | Strength  |           |         |
|-----|---------------------------------|------------------------|---------|-------|------------------|---------------|-------|-----------|-----------|---------|
|     |                                 | CLN3 2nd               | CON     | P     | CLN3 2nd         | CON           | P     | CLN3 2nd  | CON       | P       |
| 1   | Left-Cerebellum-Cortex          | 970±509                | 841±433 | 0,418 | 0.0081±0.0033    | 0.01±0.0052   | 0,226 | 3566±1685 | 2194±1097 | 0,052   |
| 2   | Left-Thalamus-Proper            | 1146±392               | 750±388 | 0,002 | 0.008±0.0033     | 0.0123±0.0052 | 0,011 | 1869±699  | 1848±655  | 0,909   |
| 3   | Left-Caudate                    | 648±388                | 502±292 | 0,361 | 0.0064±0.0034    | 0.0105±0.0041 | 0,014 | 559±276   | 911±342   | 0,013   |
| 4   | Left-Putamen                    | 590±384                | 568±338 | 0,947 | 0.0096±0.0039    | 0.0151±0.0052 | 0,003 | 2108±907  | 2637±688  | 0,052   |
| 5   | Left-Pallidum                   | 373±275                | 415±208 | 0,601 | 0.0079±0.0033    | 0.0111±0.0034 | 0,020 | 749±442   | 852±338   | 0,473   |
| 6   | Left-Hippocampus                | 683±448                | 534±396 | 0,199 | 0.0058±0.0028    | 0.0079±0.0031 | 0,050 | 500±341   | 728±251   | 0,018   |
| 7   | Left-Amygdala                   | 249±245                | 151±104 | 0,293 | 0.0041±0.0024    | 0.0052±0.0022 | 0,202 | 122±156   | 16±75     | 0,933   |
| 8   | Left-Accumbens-area             | 230±252                | 366±334 | 0,245 | 0.0033±0.0011    | 0.0061±0.0038 | 0,021 | 97±91     | 213±118   | 0,012   |
| 9   | Right-Cerebellum-Cortex         | 912±508                | 748±476 | 0,346 | 0.0079±0.0029    | 0.01±0.0048   | 0,109 | 3168±1226 | 2128±1224 | 0,096   |
| 10  | Right-Thalamus-Proper           | 813±440                | 616±454 | 0,272 | 0.0073±0.0031    | 0.0138±0.0058 | 0,002 | 1172±710  | 1993±483  | 9,3E-04 |
| 11  | Right-Caudate                   | 268±145                | 400±344 | 0,225 | 0.0079±0.0036    | 0.0111±0.0046 | 0,054 | 734±452   | 842±341   | 0,321   |
| 12  | Right-Putamen                   | 613±287                | 799±472 | 0,205 | 0.0096±0.0036    | 0.0164±0.008  | 0,009 | 2105±1126 | 3254±890  | 8,4E-04 |
| 13  | Right-Pallidum                  | 544±321                | 348±301 | 0,226 | 0.008±0.0026     | 0.0142±0.0063 | 0,005 | 842±370   | 1037±390  | 0,201   |
| 14  | Right-Hippocampus               | 561±428                | 343±238 | 0,161 | 0.0054±0.002     | 0.0097±0.0066 | 0,035 | 534±355   | 762±393   | 0,066   |
| 15  | Right-Amygdala                  | 324±261                | 425±310 | 0,449 | 0.0033±0.0008    | 0.0061±0.0051 | 0,069 | 83±39     | 202±192   | 0,059   |
| 16  | Right-Accumbens-area            | 147±136                | 364±341 | 0,052 | 0.0039±0.0021    | 0.0067±0.0046 | 0,053 | 139±111   | 301±411   | 0,215   |
| 17  | ctx_lh_G_and_S_frontomargin     | 325±205                | 198±223 | 0,166 | 0.006±0.0022     | 0.0099±0.0046 | 0,013 | 386±377   | 622±672   | 0,384   |
| 18  | ctx_lh_G_and_S_occipital_inf    | 179±212                | 188±149 | 0,945 | 0.0055±0.0029    | 0.0082±0.004  | 0,070 | 284±286   | 470±379   | 0,234   |
| 19  | ctx_lh_G_and_S_paracentral      | 363±180                | 346±281 | 0,910 | 0.0053±0.0029    | 0.0095±0.0044 | 0,010 | 607±601   | 688±374   | 0,573   |
| 20  | ctx_lh_G_and_S_subcentral       | 160±176                | 202±223 | 0,497 | 0.0066±0.0034    | 0.0107±0.006  | 0,021 | 419±372   | 511±210   | 0,213   |
| 21  | ctx_lh_G_and_S_transv_frontopol | 181±173                | 155±154 | 0,617 | 0.0067±0.0032    | 0.0095±0.0047 | 0,108 | 321±187   | 454±418   | 0,518   |
| 22  | ctx_lh_G_and_S_cingul-Ant       | 290±236                | 282±227 | 0,869 | 0.0059±0.0032    | 0.0093±0.0055 | 0,080 | 577±608   | 576±357   | 0,928   |
| 23  | ctx_lh_G_and_S_cingul-Mid-Ant   | 143±113                | 224±184 | 0,207 | 0.0054±0.0025    | 0.0082±0.0038 | 0,050 | 322±204   | 388±237   | 0,449   |
| 24  | ctx_lh_G_and_S_cingul-Mid-Post  | 119±126                | 100±89  | 0,744 | 0.0049±0.0024    | 0.0078±0.0038 | 0,025 | 235±211   | 254±130   | 0,627   |
| 25  | ctx_lh_G_cingul-Post-dorsal     | 172±114                | 204±130 | 0,545 | 0.003±0.0016     | 0.0044±0.002  | 0,054 | 89±59     | 109±77    | 0,365   |
| 26  | ctx_lh_G_cingul-Post-ventral    | 163±111                | 181±148 | 0,486 | 0.0035±0.0016    | 0.006±0.0038  | 0,042 | 179±198   | 213±158   | 0,486   |
| 27  | ctx_lh_G_cuneus                 | 427±247                | 280±140 | 0,091 | 0.0035±0.0014    | 0.0062±0.0034 | 0,018 | 245±144   | 368±213   | 0,122   |
| 28  | ctx_lh_G_front_inf-Opercular    | 202±219                | 167±88  | 0,540 | 0.0086±0.0048    | 0.0116±0.0046 | 0,043 | 870±815   | 833±342   | 0,822   |
| 29  | ctx_lh_G_front_inf-Orbital      | 65±73                  | 215±269 | 0,053 | 0.0045±0.0028    | 0.0067±0.0032 | 0,063 | 91±80     | 227±148   | 0,009   |
| 30  | ctx_lh_G_front_inf-Triangul     | 240±184                | 307±184 | 0,251 | 0.0064±0.0019    | 0.0096±0.0041 | 0,012 | 430±284   | 637±333   | 0,026   |
| 31  | ctx_lh_G_front-middle           | 532±326                | 221±155 | 0,004 | 0.0106±0.0051    | 0.0161±0.0057 | 0,010 | 1403±804  | 1682±745  | 0,224   |
| 32  | ctx_lh_G_front_sup              | 765±437                | 830±349 | 0,640 | 0.0102±0.0043    | 0.0153±0.0049 | 0,006 | 4294±2927 | 4799±1763 | 0,330   |

ON-LINE FIG 3. Continued



|     |                                  |         |         |       |               |               |         |           |          |         |
|-----|----------------------------------|---------|---------|-------|---------------|---------------|---------|-----------|----------|---------|
| 33  | ctx_lh_G_ins_lg_and_S_cent_ins   | 127±122 | 189±167 | 0,283 | 0.004±0.002   | 0.006±0.0026  | 0,026   | 146±177   | 185±127  | 0,362   |
| 34  | ctx_lh_G_insular_short           | 360±155 | 244±201 | 0,106 | 0.0041±0.0015 | 0.0077±0.0041 | 0,003   | 256±227   | 387±200  | 0,034   |
| 35  | ctx_lh_G_occipital_middle        | 474±244 | 235±166 | 0,016 | 0.0064±0.0036 | 0.0102±0.0042 | 0,015   | 732±453   | 856±349  | 0,336   |
| 36  | ctx_lh_G_occipital_sup           | 331±180 | 347±259 | 0,908 | 0.0046±0.0027 | 0.0072±0.0035 | 0,031   | 407±388   | 447±207  | 0,563   |
| 37  | ctx_lh_G_oc-temp_lat-fusiform    | 244±154 | 178±156 | 0,235 | 0.0058±0.0028 | 0.0089±0.0041 | 0,026   | 389±287   | 537±255  | 0,189   |
| 38  | ctx_lh_G_oc-temp_med-Lingual     | 460±312 | 441±318 | 0,857 | 0.0042±0.002  | 0.0071±0.0031 | 0,012   | 308±275   | 598±287  | 0,016   |
| 39  | ctx_lh_G_oc-temp_med-Parahipp    | 497±320 | 365±202 | 0,358 | 0.0046±0.0014 | 0.0064±0.0027 | 0,041   | 1283±135  | 324±130  | 0,305   |
| 40  | ctx_lh_G_orbital                 | 538±184 | 515±198 | 0,609 | 0.0061±0.0021 | 0.0105±0.0049 | 0,007   | 798±400   | 1262±596 | 0,039   |
| 41  | ctx_lh_G_pariet_inf-Angular      | 448±382 | 305±238 | 0,138 | 0.0078±0.0039 | 0.0118±0.0038 | 0,002   | 1041±695  | 961±392  | 0,924   |
| 42  | ctx_lh_G_pariet_inf-Supramar     | 128±99  | 126±118 | 0,845 | 0.0082±0.0036 | 0.0147±0.005  | 2,5E-04 | 717±567   | 1259±714 | 0,022   |
| 43  | ctx_lh_G_parietal_sup            | 624±334 | 718±286 | 0,348 | 0.0068±0.003  | 0.0101±0.0045 | 0,028   | 1182±738  | 1478±607 | 0,199   |
| 44  | ctx_lh_G_postcentral             | 261±211 | 310±212 | 0,190 | 0.0086±0.003  | 0.0124±0.0054 | 0,027   | 996±741   | 1020±422 | 0,531   |
| 45  | ctx_lh_G_precentral              | 483±373 | 392±352 | 0,438 | 0.0108±0.0048 | 0.0158±0.0044 | 0,003   | 1689±1238 | 1941±615 | 0,309   |
| 46  | ctx_lh_G_precuneus               | 713±512 | 543±589 | 0,536 | 0.0054±0.0024 | 0.0105±0.0053 | 0,006   | 654±432   | 1131±275 | 0,004   |
| 47  | ctx_lh_G_rectus                  | 211±145 | 131±128 | 0,226 | 0.0039±0.0016 | 0.0076±0.0047 | 0,027   | 217±192   | 333±360  | 0,453   |
| 48  | ctx_lh_G_subcallosal             | 160±135 | 205±250 | 0,835 | 0.0026±0.0013 | 0.0042±0.0027 | 0,056   | 64±88     | 89±63    | 0,364   |
| 49  | ctx_lh_G_temp_sup-G_T_transv     | 91±127  | 69±76   | 0,889 | 0.0036±0.0028 | 0.0059±0.0027 | 0,077   | 66±54     | 103±91   | 0,294   |
| 50  | ctx_lh_G_temp_sup-Lateral        | 486±272 | 380±284 | 0,287 | 0.0062±0.0026 | 0.0092±0.0031 | 0,005   | 694±546   | 862±466  | 0,291   |
| 51  | ctx_lh_G_temp_sup-Plan_polar     | 371±350 | 359±224 | 0,829 | 0.0036±0.0018 | 0.0056±0.0025 | 0,030   | 166±158   | 280±314  | 0,287   |
| 52  | ctx_lh_G_temp_sup-Plan_tempo     | 129±127 | 134±134 | 0,949 | 0.0048±0.0033 | 0.0098±0.003  | 5,5E-05 | 207±234   | 352±228  | 0,081   |
| 53  | ctx_lh_G_temporal_inf            | 380±234 | 432±313 | 0,475 | 0.007±0.003   | 0.0117±0.0055 | 0,011   | 799±498   | 1324±704 | 0,036   |
| 54  | ctx_lh_G_temporal_middle         | 300±210 | 353±231 | 0,579 | 0.0069±0.0025 | 0.0119±0.004  | 4,8E-04 | 895±638   | 1476±721 | 0,021   |
| 55  | ctx_lh_Lat_Fis-ant-Horizont      | 49±47   | 87±79   | 0,109 | 0.0021±0.0015 | 0.0046±0.0026 | 0,017   | 25±35     | 50±38    | 0,166   |
| 56  | ctx_lh_Lat_Fis-ant-Vertical      | 75±86   | 92±94   | 0,587 | 0.0032±0.0024 | 0.006±0.0028  | 0,008   | 35±55     | 70±35    | 0,050   |
| 57  | ctx_lh_Lat_Fis-post              | 105±114 | 61±63   | 0,362 | 0.0037±0.002  | 0.0064±0.0035 | 0,004   | 121±140   | 115±59   | 0,719   |
| 58  | ctx_lh_Pole_occipital            | 258±319 | 324±218 | 0,524 | 0.0051±0.0022 | 0.007±0.0055  | 0,252   | 1454±528  | 417±379  | 0,984   |
| 59  | ctx_lh_Pole_temporal             | 596±251 | 658±386 | 0,880 | 0.006±0.0025  | 0.0099±0.0049 | 0,011   | 1005±886  | 1373±630 | 0,181   |
| 60  | ctx_lh_S_calcarine               | 380±254 | 376±299 | 0,962 | 0.0041±0.002  | 0.006±0.0033  | 0,085   | 278±169   | 309±195  | 0,433   |
| 61  | ctx_lh_S_central                 | 268±247 | 265±220 | 0,990 | 0.0056±0.002  | 0.0088±0.0041 | 0,008   | 239±181   | 361±174  | 0,030   |
| 62  | ctx_lh_S_cingul-Marginalis       | 116±73  | 172±227 | 0,437 | 0.004±0.0021  | 0.008±0.0047  | 0,011   | 155±102   | 307±243  | 0,070   |
| 63  | ctx_lh_S_circular_insula_ant     | 112±128 | 69±108  | 0,270 | 0.0033±0.0016 | 0.0053±0.0028 | 0,043   | 84±76     | 65±38    | 0,510   |
| 64  | ctx_lh_S_circular_insula_inf     | 289±352 | 229±123 | 0,531 | 0.0047±0.002  | 0.0075±0.0041 | 0,026   | 320±215   | 326±147  | 0,699   |
| 65  | ctx_lh_S_circular_insula_sup     | 259±160 | 214±124 | 0,355 | 0.0037±0.0017 | 0.0059±0.0021 | 8,6E-04 | 141±132   | 152±81   | 0,526   |
| 66  | ctx_lh_S_collat_transv_ant       | 216±308 | 340±270 | 0,224 | 0.0042±0.0024 | 0.0058±0.0025 | 0,155   | 235±201   | 231±146  | 0,848   |
| 67  | ctx_lh_S_collat_transv_post      | 34±59   | 103±144 | 0,179 | 0.003±0.0018  | 0.007±0.0067  | 0,058   | 35±57     | 122±137  | 0,053   |
| 68  | ctx_lh_S_front_inf               | 183±202 | 90±113  | 0,276 | 0.0084±0.0056 | 0.0109±0.006  | 0,186   | 361±300   | 242±147  | 0,390   |
| 69  | ctx_lh_S_front_middle            | 66±116  | 148±147 | 0,217 | 0.0072±0.0037 | 0.0096±0.004  | 0,148   | 119±83    | 239±334  | 0,313   |
| 70  | ctx_lh_S_front_sup               | 306±275 | 235±216 | 0,584 | 0.0085±0.0043 | 0.0144±0.0072 | 0,025   | 487±478   | 632±293  | 0,168   |
| 71  | ctx_lh_S_interm_prim-Jensen      | 61±72   | 37±74   | 0,468 | 0.0031±0.0021 | 0.0083±0.0057 | 0,002   | 71±110    | 53±37    | 0,820   |
| 72  | ctx_lh_S_intrapariet_and_P_trans | 408±299 | 553±547 | 0,308 | 0.0051±0.0028 | 0.0079±0.0032 | 0,014   | 359±292   | 583±301  | 0,073   |
| 73  | ctx_lh_S_oc-middle_and_Lunatus   | 99±178  | 209±159 | 0,080 | 0.0039±0.0027 | 0.0046±0.0023 | 0,388   | 96±90     | 113±70   | 0,461   |
| 74  | ctx_lh_S_oc-sup_and_transversal  | 293±353 | 256±158 | 0,788 | 0.0036±0.0024 | 0.006±0.0034  | 0,031   | 120±104   | 260±211  | 0,038   |
| 75  | ctx_lh_S_occipital_ant           | 63±60   | 72±54   | 0,653 | 0.0031±0.0021 | 0.0063±0.0038 | 0,009   | 86±96     | 110±80   | 0,522   |
| 76  | ctx_lh_S_oc-temp_lat             | 193±190 | 176±161 | 0,914 | 0.0039±0.002  | 0.0068±0.0033 | 0,011   | 126±112   | 202±143  | 0,110   |
| 77  | ctx_lh_S_oc-temp_med_and_Lingual | 219±300 | 252±268 | 0,572 | 0.0054±0.0021 | 0.008±0.0047  | 0,093   | 349±253   | 435±149  | 0,151   |
| 78  | ctx_lh_S_orbital_lateral         | 90±75   | 141±179 | 0,442 | 0.0046±0.002  | 0.0056±0.0025 | 0,248   | 110±90    | 107±94   | 0,962   |
| 79  | ctx_lh_S_orbital_med-olfact      | 141±134 | 123±105 | 0,891 | 0.0024±0.0013 | 0.004±0.0022  | 0,070   | 29±18     | 66±44    | 0,016   |
| 80  | ctx_lh_S_orbital-H_Shaped        | 71±89   | 108±135 | 0,427 | 0.004±0.002   | 0.0068±0.0028 | 0,008   | 69±50     | 106±57   | 0,031   |
| 81  | ctx_lh_S_parieto_occipital       | 282±191 | 302±214 | 0,664 | 0.0037±0.0015 | 0.0064±0.0039 | 0,022   | 259±222   | 319±116  | 0,235   |
| 82  | ctx_lh_S_pericallosal            | 461±335 | 321±247 | 0,213 | 0.0039±0.0016 | 0.0058±0.0029 | 0,045   | 214±100   | 218±72   | 0,663   |
| 83  | ctx_lh_S_postcentral             | 168±188 | 260±181 | 0,090 | 0.0074±0.0038 | 0.0092±0.0042 | 0,145   | 454±366   | 385±133  | 0,991   |
| 84  | ctx_lh_S_precentral-inf-part     | 60±84   | 60±56   | 0,964 | 0.0072±0.0033 | 0.0106±0.0064 | 0,065   | 173±236   | 191±119  | 0,655   |
| 85  | ctx_lh_S_precentral-sup-part     | 68±101  | 125±156 | 0,235 | 0.0073±0.0033 | 0.0102±0.0027 | 0,027   | 149±118   | 228±121  | 0,081   |
| 86  | ctx_lh_S_suborbital              | 188±154 | 105±104 | 0,208 | 0.0036±0.0014 | 0.0056±0.0042 | 0,151   | 132±82    | 151±216  | 0,967   |
| 87  | ctx_lh_S_subparietal             | 260±261 | 202±140 | 0,343 | 0.0036±0.0019 | 0.0061±0.004  | 0,036   | 198±204   | 246±170  | 0,317   |
| 88  | ctx_lh_S_temporal_inf            | 157±94  | 165±177 | 0,994 | 0.004±0.0014  | 0.0084±0.005  | 0,004   | 134±106   | 311±277  | 0,040   |
| 89  | ctx_lh_S_temporal_sup            | 330±275 | 171±164 | 0,104 | 0.0064±0.0025 | 0.0101±0.0032 | 5,1E-04 | 622±393   | 786±419  | 0,161   |
| 90  | ctx_lh_S_temporal_transverse     | 91±118  | 43±75   | 0,315 | 0.0025±0.0011 | 0.0039±0.0029 | 0,159   | 38±37     | 53±95    | 0,780   |
| 91  | ctx_rh_G_and_S_frontomargin      | 189±92  | 199±161 | 0,877 | 0.0073±0.0037 | 0.0108±0.0046 | 0,014   | 724±569   | 703±461  | 0,765   |
| 92  | ctx_rh_G_and_S_occipital_inf     | 138±105 | 181±173 | 0,529 | 0.0053±0.0022 | 0.0099±0.0045 | 0,001   | 295±216   | 552±457  | 0,101   |
| 93  | ctx_rh_G_and_S_paracentral       | 168±129 | 286±165 | 0,082 | 0.0045±0.0016 | 0.0081±0.0041 | 0,006   | 228±294   | 473±287  | 0,040   |
| 94  | ctx_rh_G_and_S_subcentral        | 160±121 | 109±92  | 0,295 | 0.0068±0.0034 | 0.0106±0.006  | 0,033   | 434±316   | 370±224  | 0,996   |
| 95  | ctx_rh_G_and_S_transv_frontopol  | 270±249 | 237±278 | 0,875 | 0.0072±0.0043 | 0.0123±0.0059 | 0,025   | 516±446   | 637±275  | 0,329   |
| 96  | ctx_rh_G_and_S_cingul-Ant        | 269±244 | 339±255 | 0,591 | 0.0059±0.0028 | 0.0101±0.0056 | 0,019   | 435±244   | 650±226  | 0,031   |
| 97  | ctx_rh_G_and_S_cingul-Mid-Ant    | 325±214 | 173±137 | 0,044 | 0.0056±0.0031 | 0.0102±0.0057 | 0,015   | 418±279   | 562±348  | 0,295   |
| 98  | ctx_rh_G_and_S_cingul-Mid-Post   | 184±149 | 311±232 | 0,124 | 0.0051±0.0028 | 0.0085±0.004  | 0,018   | 318±289   | 462±191  | 0,115   |
| 99  | ctx_rh_G_cingul-Post-dorsal      | 154±109 | 164±124 | 0,796 | 0.003±0.0016  | 0.0055±0.0033 | 0,032   | 89±72     | 150±78   | 0,048   |
| 100 | ctx_rh_G_cingul-Post-ventral     | 161±183 | 212±174 | 0,402 | 0.0035±0.0019 | 0.0056±0.0031 | 0,042   | 160±120   | 234±131  | 0,156   |
| 101 | ctx_rh_G_cuneus                  | 339±192 | 588±328 | 0,013 | 0.0032±0.0017 | 0.0066±0.0035 | 0,002   | 1227±190  | 432±171  | 3,7E-04 |
| 102 | ctx_rh_G_front_inf-Opercular     | 309±270 | 155±119 | 0,061 | 0.0074±0.0043 | 0.0141±0.0059 | 0,004   | 678±620   | 1048±615 | 0,111   |

ON-LINE FIG 3. Continued



|     |                                  |          |          |       |               |               |         |           |           |         |
|-----|----------------------------------|----------|----------|-------|---------------|---------------|---------|-----------|-----------|---------|
| 103 | ctx_rh_G_front_inf-Orbital       | 212±162  | 109±87   | 0,102 | 0.0042±0.0019 | 0.0079±0.0029 | 0,002   | 185±219   | 263±207   | 0,451   |
| 104 | ctx_rh_G_front_inf-Triangular    | 231±205  | 251±272  | 0,913 | 0.0072±0.0033 | 0.0126±0.0061 | 0,020   | 575±400   | 765±282   | 0,151   |
| 105 | ctx_rh_G_front-middle            | 424±280  | 360±213  | 0,790 | 0.0103±0.0042 | 0.0173±0.0064 | 0,003   | 1621±1207 | 1923±633  | 0,307   |
| 106 | ctx_rh_G_front_sup               | 1049±620 | 1036±700 | 0,839 | 0.0097±0.004  | 0.0154±0.0065 | 0,010   | 3687±2334 | 4862±1537 | 0,054   |
| 107 | ctx_rh_G_Ins_lg_and_S_cent_ins   | 262±255  | 205±219  | 0,566 | 0.0045±0.0025 | 0.008±0.0052  | 0,038   | 182±131   | 295±241   | 0,121   |
| 108 | ctx_rh_G_insular_short           | 196±180  | 193±173  | 0,874 | 0.0056±0.002  | 0.0108±0.007  | 0,021   | 350±184   | 527±287   | 0,053   |
| 109 | ctx_rh_G_occipital-middle        | 270±215  | 254±208  | 0,613 | 0.0079±0.0034 | 0.0129±0.0051 | 0,003   | 979±693   | 1381±888  | 0,145   |
| 110 | ctx_rh_G_occipital_sup           | 344±216  | 608±321  | 0,031 | 0.0044±0.0016 | 0.0074±0.0031 | 0,003   | 391±250   | 652±335   | 0,034   |
| 111 | ctx_rh_G_oc-temp_lat-fusiform    | 223±187  | 125±117  | 0,103 | 0.0051±0.0021 | 0.0088±0.0042 | 0,004   | 305±233   | 383±162   | 0,183   |
| 112 | ctx_rh_G_oc-temp_med-Lingual     | 486±303  | 395±305  | 0,476 | 0.004±0.0016  | 0.008±0.0047  | 0,004   | 310±223   | 668±308   | 9,7E-05 |
| 113 | ctx_rh_G_oc-temp_med-Parahipp    | 472±249  | 362±240  | 0,374 | 0.0041±0.0016 | 0.0064±0.0031 | 0,028   | 235±166   | 302±168   | 0,204   |
| 114 | ctx_rh_G_orbital                 | 513±354  | 620±456  | 0,563 | 0.0066±0.0022 | 0.0106±0.0045 | 0,002   | 786±581   | 1231±617  | 0,062   |
| 115 | ctx_rh_G_pariet_inf-Angular      | 185±191  | 227±140  | 0,466 | 0.0102±0.0038 | 0.0165±0.0061 | 0,003   | 1246±756  | 1834±775  | 0,036   |
| 116 | ctx_rh_G_pariet_inf-Supramar     | 82±99    | 127±127  | 0,220 | 0.0106±0.0053 | 0.0171±0.0078 | 0,015   | 1094±921  | 1216±634  | 0,455   |
| 117 | ctx_rh_G_parietal_sup            | 489±346  | 645±415  | 0,613 | 0.0054±0.002  | 0.0106±0.0051 | 0,001   | 646±530   | 1080±398  | 0,027   |
| 118 | ctx_rh_G_postcentral             | 363±311  | 379±262  | 0,905 | 0.0083±0.0029 | 0.0136±0.0072 | 0,019   | 861±602   | 1063±472  | 0,299   |
| 119 | ctx_rh_G_precentral              | 317±210  | 405±369  | 0,479 | 0.0113±0.0036 | 0.0191±0.0106 | 0,020   | 1929±1264 | 2462±818  | 0,199   |
| 120 | ctx_rh_G_precuneus               | 788±524  | 459±223  | 0,053 | 0.0049±0.0023 | 0.0092±0.0044 | 0,004   | 775±575   | 1219±571  | 0,035   |
| 121 | ctx_rh_G_rectus                  | 328±237  | 250±180  | 0,390 | 0.0033±0.0018 | 0.0052±0.0026 | 0,021   | 143±139   | 150±146   | 0,729   |
| 122 | ctx_rh_G_subcallosal             | 163±148  | 208±275  | 0,654 | 0.0022±0.0018 | 0.0043±0.0029 | 0,029   | 57±60     | 136±190   | 0,165   |
| 123 | ctx_rh_G_temp_sup-G_T_transv     | 117±137  | 120±101  | 0,969 | 0.0034±0.0011 | 0.0071±0.0046 | 0,013   | 54±44     | 139±97    | 0,011   |
| 124 | ctx_rh_G_temp_sup-Lateral        | 245±196  | 415±281  | 0,094 | 0.0042±0.0035 | 0.0129±0.0073 | 0,044   | 900±595   | 1314±648  | 0,101   |
| 125 | ctx_rh_G_temp_sup-Plan_polar     | 411±267  | 307±208  | 0,197 | 0.004±0.0017  | 0.0069±0.0035 | 0,012   | 202±116   | 331±202   | 0,050   |
| 126 | ctx_rh_G_temp_sup-Plan_tempo     | 113±184  | 68±65    | 0,583 | 0.0066±0.0036 | 0.0111±0.0049 | 0,008   | 204±178   | 283±98    | 0,072   |
| 127 | ctx_rh_G_temporal_inf            | 257±281  | 180±153  | 0,452 | 0.0071±0.0028 | 0.0126±0.0051 | 0,001   | 785±675   | 967±437   | 0,188   |
| 128 | ctx_rh_G_temporal-middle         | 245±218  | 351±285  | 0,527 | 0.0099±0.0053 | 0.016±0.0083  | 0,023   | 1641±1158 | 2261±760  | 0,066   |
| 129 | ctx_rh_Lat_Fis-ant-Horizont      | 91±115   | 97±126   | 0,957 | 0.0027±0.0016 | 0.0061±0.0032 | 0,003   | 41±61     | 100±99    | 0,100   |
| 130 | ctx_rh_Lat_Fis-ant-Vertical      | 17±40    | 55±85    | 0,172 | 0.0019±0.0019 | 0.0069±0.0051 | 0,003   | 14±16     | 50±49     | 0,008   |
| 131 | ctx_rh_Lat_Fis-post              | 155±172  | 84±70    | 0,222 | 0.0051±0.0032 | 0.007±0.0044  | 0,173   | 168±167   | 124±75    | 0,489   |
| 132 | ctx_rh_Pole_occipital            | 392±271  | 431±373  | 0,615 | 0.0049±0.0018 | 0.0081±0.0035 | 0,009   | 474±288   | 646±319   | 0,119   |
| 133 | ctx_rh_Pole_temporal             | 729±489  | 495±323  | 0,155 | 0.0065±0.0027 | 0.0105±0.0059 | 0,025   | 1178±788  | 1149±526  | 0,705   |
| 134 | ctx_rh_S_calcarine               | 456±195  | 437±305  | 0,543 | 0.0036±0.0014 | 0.0064±0.003  | 0,003   | 265±204   | 415±273   | 0,107   |
| 135 | ctx_rh_S_central                 | 315±204  | 253±140  | 0,329 | 0.0061±0.0033 | 0.01±0.0055   | 0,030   | 257±191   | 456±274   | 0,016   |
| 136 | ctx_rh_S_cingul-Marginalis       | 156±177  | 206±200  | 0,484 | 0.0046±0.0024 | 0.0075±0.0036 | 0,020   | 213±197   | 362±203   | 0,046   |
| 137 | ctx_rh_S_circular_insula_ant     | 26±24    | 44±34    | 0,071 | 0.0042±0.0029 | 0.0065±0.0028 | 0,073   | 77±85     | 99±96     | 0,432   |
| 138 | ctx_rh_S_circular_insula_inf     | 413±271  | 310±174  | 0,278 | 0.005±0.0018  | 0.0081±0.0044 | 0,027   | 346±148   | 430±286   | 0,362   |
| 139 | ctx_rh_S_circular_insula_sup     | 137±110  | 179±135  | 0,330 | 0.0038±0.0015 | 0.0064±0.0036 | 0,020   | 92±88     | 131±94    | 0,209   |
| 140 | ctx_rh_S_collat_transv_ant       | 211±411  | 115±146  | 0,629 | 0.0038±0.0018 | 0.0079±0.006  | 0,019   | 158±158   | 294±287   | 0,130   |
| 141 | ctx_rh_S_collat_transv_post      | 81±93    | 136±144  | 0,391 | 0.0029±0.0015 | 0.0046±0.003  | 0,058   | 45±38     | 61±43     | 0,291   |
| 142 | ctx_rh_S_front_inf               | 184±147  | 163±163  | 0,957 | 0.0057±0.0022 | 0.0104±0.0066 | 0,017   | 232±243   | 237±168   | 0,681   |
| 143 | ctx_rh_S_front-middle            | 272±224  | 201±168  | 0,526 | 0.007±0.0041  | 0.0114±0.0059 | 0,040   | 342±407   | 351±300   | 0,788   |
| 144 | ctx_rh_S_front_sup               | 278±246  | 292±361  | 0,871 | 0.0081±0.0064 | 0.013±0.0065  | 0,053   | 308±237   | 550±329   | 0,067   |
| 145 | ctx_rh_S_interm_prim-Jensen      | 27±34    | 20±31    | 0,682 | 0.0047±0.0027 | 0.0079±0.0043 | 0,030   | 80±113    | 45±26     | 0,447   |
| 146 | ctx_rh_S_intrapariet_and_P_trans | 365±275  | 340±258  | 0,777 | 0.0058±0.003  | 0.0098±0.0056 | 0,025   | 399±241   | 605±386   | 0,079   |
| 147 | ctx_rh_S_oc-middle_and_Lunatus   | 79±123   | 124±81   | 0,156 | 0.0031±0.0026 | 0.0055±0.0033 | 0,039   | 79±97     | 119±125   | 0,390   |
| 148 | ctx_rh_S_oc_sup_and_transversal  | 232±241  | 436±447  | 0,341 | 0.0041±0.0022 | 0.0066±0.0038 | 0,012   | 155±118   | 321±348   | 0,044   |
| 149 | ctx_rh_S_occipital_ant           | 110±109  | 88±81    | 0,406 | 0.0045±0.0012 | 0.0091±0.0061 | 0,013   | 114±68    | 284±338   | 0,092   |
| 150 | ctx_rh_S_oc-temp_lat             | 90±213   | 140±194  | 0,664 | 0.0059±0.0059 | 0.0063±0.0027 | 0,603   | 90±49     | 126±140   | 0,296   |
| 151 | ctx_rh_S_oc-temp_med_and_Lingual | 395±336  | 181±135  | 0,088 | 0.0042±0.0014 | 0.0062±0.0026 | 0,011   | 303±272   | 203±72    | 0,382   |
| 152 | ctx_rh_S_orbital_lateral         | 125±138  | 196±269  | 0,433 | 0.0038±0.0009 | 0.007±0.0044  | 0,025   | 85±75     | 171±146   | 0,134   |
| 153 | ctx_rh_S_orbital_med-olfact      | 236±293  | 118±123  | 0,132 | 0.0028±0.0015 | 0.0056±0.0039 | 0,021   | 68±58     | 128±92    | 0,078   |
| 154 | ctx_rh_S_orbital-H_Shaped        | 106±106  | 153±214  | 0,592 | 0.0048±0.0038 | 0.0071±0.0054 | 0,118   | 87±67     | 129±133   | 0,341   |
| 155 | ctx_rh_S_parieto_occipital       | 463±421  | 504±312  | 0,739 | 0.0039±0.0021 | 0.0068±0.0031 | 0,008   | 304±193   | 425±166   | 0,043   |
| 156 | ctx_rh_S_pericallosal            | 701±301  | 526±347  | 0,154 | 0.0046±0.0019 | 0.0079±0.0049 | 0,037   | 525±434   | 636±428   | 0,446   |
| 157 | ctx_rh_S_postcentral             | 266±358  | 275±159  | 0,772 | 0.0062±0.0028 | 0.0099±0.0046 | 0,020   | 255±131   | 444±263   | 0,028   |
| 158 | ctx_rh_S_precentral-inf-part     | 115±108  | 71±69    | 0,265 | 0.0062±0.0026 | 0.012±0.0065  | 0,008   | 219±203   | 247±134   | 0,337   |
| 159 | ctx_rh_S_precentral-sup-part     | 122±102  | 193±316  | 0,295 | 0.0066±0.0031 | 0.0124±0.0079 | 0,030   | 150±112   | 289±292   | 0,073   |
| 160 | ctx_rh_S_suborbital              | 67±75    | 88±112   | 0,554 | 0.0024±0.0015 | 0.0031±0.0022 | 0,349   | 35±42     | 33±24     | 0,924   |
| 161 | ctx_rh_S_subparietal             | 357±399  | 221±171  | 0,298 | 0.0041±0.0026 | 0.0064±0.0029 | 0,047   | 224±226   | 344±241   | 0,189   |
| 162 | ctx_rh_S_temporal_inf            | 180±188  | 200±178  | 0,651 | 0.0046±0.0018 | 0.0087±0.0035 | 6,5E-04 | 192±201   | 352±281   | 0,057   |
| 163 | ctx_rh_S_temporal_sup            | 462±432  | 220±158  | 0,051 | 0.0085±0.0042 | 0.0148±0.0065 | 0,007   | 1006±634  | 1348±599  | 0,152   |
| 164 | ctx_rh_S_temporal_transverse     | 67±73    | 70±69    | 0,788 | 0.0031±0.001  | 0.0062±0.004  | 0,017   | 48±64     | 77±50     | 0,205   |

### CLN3 1st vs 2nd acquisition

| Idx | Label name             | Betweenness centrality |          |       | Local efficiency |               |       | Strength  |           |       |
|-----|------------------------|------------------------|----------|-------|------------------|---------------|-------|-----------|-----------|-------|
|     |                        | CLN3 1st               | CLN3 2nd | P     | CLN3 1st         | CLN3 2nd      | P     | CLN3 1st  | CLN3 2nd  | P     |
| 1   | Left-Cerebellum-Cortex | 722±294                | 970±509  | 0,330 | 0.0085±0.0031    | 0.0081±0.0033 | 0,960 | 3143±1662 | 3566±1685 | 0,356 |
| 2   | Left-Thalamus-Proper   | 789±417                | 1146±392 | 0,102 | 0.0091±0.0047    | 0.008±0.0033  | 0,606 | 1740±621  | 1869±699  | 0,331 |
| 3   | Left-Caudate           | 619±369                | 648±388  | 0,704 | 0.0077±0.0049    | 0.0064±0.0034 | 0,794 | 849±649   | 559±276   | 0,481 |
| 4   | Left-Putamen           | 700±430                | 590±384  | 0,372 | 0.0103±0.0055    | 0.0096±0.0039 | 0,996 | 2278±1299 | 2108±907  | 0,595 |

ON-LINE FIG 3. Continued

|                                     |          |         |       |               |               |       |           |           |       |
|-------------------------------------|----------|---------|-------|---------------|---------------|-------|-----------|-----------|-------|
| 5 Left-Pallidum                     | 410±285  | 373±275 | 0,851 | 0.0093±0.0057 | 0.0079±0.0033 | 0,706 | 1948±580  | 749±442   | 0,680 |
| 6 Left-Hippocampus                  | 650±466  | 683±448 | 0,491 | 0.0062±0.0026 | 0.0058±0.0028 | 0,971 | 1757±336  | 500±341   | 0,215 |
| 7 Left-Amygdala                     | 146±154  | 249±245 | 0,223 | 0.0029±0.0018 | 0.0041±0.0024 | 0,043 | 73±53     | 122±156   | 0,206 |
| 8 Left-Accumbens-area               | 284±237  | 230±252 | 0,397 | 0.0044±0.0027 | 0.0033±0.0011 | 0,306 | 182±144   | 97±91     | 0,159 |
| 9 Right-Cerebellum-Cortex           | 1137±563 | 912±508 | 0,383 | 0.0076±0.003  | 0.0079±0.0029 | 0,629 | 2916±1524 | 3168±1226 | 0,401 |
| 10 Right-Thalamus-Proper            | 443±319  | 813±440 | 0,030 | 0.0089±0.0041 | 0.0073±0.0031 | 0,526 | 1693±1043 | 1172±710  | 0,422 |
| 11 Right-Caudate                    | 436±343  | 268±145 | 0,106 | 0.0076±0.0043 | 0.0079±0.0036 | 0,450 | 1837±469  | 734±452   | 0,638 |
| 12 Right-Putamen                    | 954±410  | 613±287 | 0,019 | 0.0097±0.0057 | 0.0096±0.0036 | 0,832 | 2180±955  | 2105±1126 | 0,605 |
| 13 Right-Pallidum                   | 338±205  | 544±321 | 0,071 | 0.0078±0.0035 | 0.008±0.0026  | 0,673 | 759±333   | 842±370   | 0,278 |
| 14 Right-Hippocampus                | 585±394  | 561±428 | 0,941 | 0.0052±0.0017 | 0.0054±0.002  | 0,354 | 564±425   | 534±355   | 0,611 |
| 15 Right-Amygdala                   | 238±274  | 324±261 | 0,547 | 0.0035±0.0019 | 0.0033±0.0008 | 0,965 | 103±72    | 83±39     | 0,703 |
| 16 Right-Accumbens-area             | 218±227  | 147±136 | 0,716 | 0.004±0.0019  | 0.0039±0.0021 | 0,791 | 139±121   | 139±111   | 0,601 |
| 17 ctx_lh_G_and_S_frontomargin      | 352±294  | 325±205 | 0,783 | 0.0079±0.006  | 0.006±0.0022  | 0,364 | 612±558   | 386±377   | 0,279 |
| 18 ctx_lh_G_and_S_occipital_inf     | 181±173  | 179±212 | 0,575 | 0.0069±0.0038 | 0.0055±0.0029 | 0,314 | 534±622   | 284±286   | 0,256 |
| 19 ctx_lh_G_and_S_paracentral       | 374±274  | 363±180 | 0,609 | 0.0054±0.0028 | 0.0053±0.0029 | 0,758 | 509±431   | 607±601   | 0,299 |
| 20 ctx_lh_G_and_S_subcentral        | 127±147  | 160±176 | 0,709 | 0.0084±0.0057 | 0.0066±0.0034 | 0,605 | 572±400   | 419±372   | 0,714 |
| 21 ctx_lh_G_and_S_transv_frontopol  | 211±178  | 181±173 | 0,885 | 0.0076±0.0042 | 0.0067±0.0032 | 0,789 | 559±523   | 321±187   | 0,377 |
| 22 ctx_lh_G_and_S_cingul-Ant        | 217±215  | 290±236 | 0,355 | 0.0054±0.0023 | 0.0059±0.0032 | 0,099 | 382±311   | 577±608   | 0,041 |
| 23 ctx_lh_G_and_S_cingul-Mid-Ant    | 150±118  | 143±113 | 0,869 | 0.0059±0.0036 | 0.0054±0.0025 | 0,851 | 398±222   | 322±204   | 0,944 |
| 24 ctx_lh_G_and_S_cingul-Mid-Post   | 161±119  | 119±126 | 0,573 | 0.0047±0.0024 | 0.0049±0.0024 | 0,358 | 260±138   | 235±211   | 0,453 |
| 25 ctx_lh_G_cingul-Post-dorsal      | 227±153  | 172±114 | 0,179 | 0.0033±0.0018 | 0.003±0.0016  | 0,645 | 123±75    | 89±59     | 0,188 |
| 26 ctx_lh_G_cingul-Post-ventral     | 353±279  | 163±111 | 0,031 | 0.0032±0.0017 | 0.0035±0.0016 | 0,807 | 148±121   | 179±198   | 0,584 |
| 27 ctx_lh_G_cuneus                  | 299±193  | 427±247 | 0,168 | 0.0044±0.0022 | 0.0035±0.0014 | 0,458 | 307±146   | 245±144   | 0,682 |
| 28 ctx_lh_G_front_inf-Opercular     | 174±174  | 202±219 | 0,896 | 0.0083±0.0056 | 0.0086±0.0048 | 0,487 | 831±819   | 870±815   | 0,410 |
| 29 ctx_lh_G_front_inf-Orbital       | 147±170  | 65±73   | 0,157 | 0.0049±0.0027 | 0.0045±0.0028 | 0,802 | 198±282   | 91±80     | 0,364 |
| 30 ctx_lh_G_oc-temp_inf-Triangul    | 349±163  | 240±184 | 0,159 | 0.0077±0.0047 | 0.0064±0.0019 | 0,682 | 645±583   | 430±284   | 0,566 |
| 31 ctx_lh_G_front_middle            | 336±295  | 532±326 | 0,132 | 0.0128±0.0094 | 0.0106±0.0051 | 0,729 | 1334±758  | 1403±804  | 0,417 |
| 32 ctx_lh_G_front_sup               | 824±323  | 765±437 | 0,523 | 0.011±0.0065  | 0.0102±0.0043 | 0,830 | 3748±2198 | 4294±2927 | 0,093 |
| 33 ctx_lh_G_ins_lg_and_S_cent_ins   | 202±156  | 127±122 | 0,460 | 0.0047±0.0027 | 0.004±0.002   | 0,498 | 199±150   | 146±177   | 0,639 |
| 34 ctx_lh_G_insular_short           | 343±215  | 360±155 | 0,950 | 0.0052±0.003  | 0.0041±0.0015 | 0,457 | 243±182   | 256±227   | 0,322 |
| 35 ctx_lh_G_occipital_middle        | 285±213  | 474±244 | 0,039 | 0.0073±0.0035 | 0.0064±0.0036 | 0,843 | 1019±893  | 732±453   | 0,559 |
| 36 ctx_lh_G_occipital_sup           | 326±196  | 331±180 | 0,858 | 0.0046±0.0021 | 0.0046±0.0027 | 0,778 | 393±331   | 407±388   | 0,570 |
| 37 ctx_lh_G_oc-temp_lat-fusiform    | 207±166  | 244±154 | 0,347 | 0.0055±0.002  | 0.0058±0.0028 | 0,542 | 335±239   | 389±287   | 0,223 |
| 38 ctx_lh_G_oc-temp_med-Lingual     | 379±235  | 460±312 | 0,319 | 0.0044±0.0016 | 0.0042±0.002  | 0,732 | 417±355   | 308±275   | 0,391 |
| 39 ctx_lh_G_oc-temp_med-Parahip     | 358±233  | 497±320 | 0,257 | 0.005±0.0025  | 0.0046±0.0014 | 0,955 | 327±207   | 283±135   | 0,902 |
| 40 ctx_lh_G_orbital                 | 481±332  | 538±184 | 0,943 | 0.0084±0.0053 | 0.0061±0.0021 | 0,183 | 1034±506  | 798±400   | 0,185 |
| 41 ctx_lh_G_pariet_inf-Angular      | 234±190  | 448±382 | 0,083 | 0.0096±0.0056 | 0.0078±0.0039 | 0,524 | 1115±646  | 1041±695  | 0,997 |
| 42 ctx_lh_G_pariet_inf-Supramar     | 74±73    | 128±99  | 0,149 | 0.0107±0.0062 | 0.0082±0.0036 | 0,362 | 971±626   | 717±567   | 0,597 |
| 43 ctx_lh_G_parietal_sup            | 633±415  | 624±334 | 0,955 | 0.0065±0.0033 | 0.0068±0.003  | 0,522 | 980±647   | 1182±738  | 0,135 |
| 44 ctx_lh_G_postcentral             | 344±314  | 261±211 | 0,804 | 0.0091±0.0053 | 0.0086±0.003  | 0,973 | 802±434   | 996±741   | 0,045 |
| 45 ctx_lh_G_precentral              | 381±225  | 483±373 | 0,596 | 0.0115±0.0062 | 0.0108±0.0048 | 0,954 | 1759±1177 | 1689±1238 | 0,774 |
| 46 ctx_lh_G_precuneus               | 617±476  | 713±512 | 0,931 | 0.0057±0.0024 | 0.0054±0.0024 | 0,931 | 706±347   | 654±432   | 0,768 |
| 47 ctx_lh_G_rectus                  | 249±198  | 211±145 | 0,711 | 0.005±0.0029  | 0.0039±0.0016 | 0,310 | 238±165   | 217±192   | 0,947 |
| 48 ctx_lh_G_subcallosal             | 271±252  | 160±135 | 0,328 | 0.0026±0.0013 | 0.0026±0.0013 | 0,863 | 80±80     | 64±88     | 0,771 |
| 49 ctx_lh_G_temp_sup-G_T_transv     | 64±78    | 91±127  | 0,486 | 0.0043±0.0031 | 0.0036±0.0028 | 0,571 | 77±70     | 66±54     | 0,941 |
| 50 ctx_lh_G_temp_sup-Lateral        | 340±230  | 486±272 | 0,223 | 0.0079±0.004  | 0.0062±0.0026 | 0,402 | 809±528   | 694±546   | 0,934 |
| 51 ctx_lh_G_temp_sup-Plan_polar     | 260±166  | 371±350 | 0,158 | 0.0034±0.0025 | 0.0036±0.0018 | 0,828 | 102±82    | 166±158   | 0,105 |
| 52 ctx_lh_G_temp_sup-Plan_tempo     | 96±104   | 129±127 | 0,955 | 0.0057±0.0039 | 0.0048±0.0033 | 0,842 | 176±121   | 207±234   | 0,238 |
| 53 ctx_lh_G_temporal_inf            | 449±387  | 380±234 | 0,677 | 0.0077±0.0039 | 0.007±0.003   | 0,897 | 882±483   | 799±498   | 0,999 |
| 54 ctx_lh_G_temporal_middle         | 416±477  | 300±210 | 0,342 | 0.0092±0.0054 | 0.0069±0.0025 | 0,342 | 954±501   | 895±638   | 0,830 |
| 55 ctx_lh_Lat_Fis-ant-Horizont      | 41±33    | 49±47   | 0,625 | 0.0034±0.0024 | 0.0021±0.0015 | 0,118 | 33±32     | 25±35     | 0,546 |
| 56 ctx_lh_Lat_Fis-ant-Vertical      | 49±70    | 75±86   | 0,409 | 0.0037±0.0032 | 0.0032±0.0024 | 0,963 | 44±45     | 35±55     | 0,953 |
| 57 ctx_lh_Lat_Fis-post              | 111±79   | 105±114 | 0,921 | 0.0044±0.0026 | 0.0037±0.002  | 0,996 | 181±330   | 121±140   | 0,945 |
| 58 ctx_lh_Pole_occipital            | 245±293  | 258±319 | 0,644 | 0.0059±0.0034 | 0.0051±0.0022 | 0,761 | 479±373   | 454±528   | 0,630 |
| 59 ctx_lh_Pole_temporal             | 517±274  | 596±251 | 0,248 | 0.0069±0.0037 | 0.006±0.0025  | 0,605 | 1040±521  | 1005±886  | 0,829 |
| 60 ctx_lh_S_calcarine               | 315±216  | 380±254 | 0,269 | 0.0047±0.0021 | 0.0041±0.002  | 0,625 | 404±187   | 278±169   | 0,232 |
| 61 ctx_lh_S_central                 | 229±297  | 268±247 | 0,776 | 0.0064±0.0037 | 0.0056±0.002  | 0,672 | 234±206   | 239±181   | 0,770 |
| 62 ctx_lh_S_cingul-Marginalis       | 286±222  | 116±73  | 0,014 | 0.0042±0.0021 | 0.004±0.0021  | 0,911 | 232±221   | 155±102   | 0,425 |
| 63 ctx_lh_S_circular_insula_ant     | 111±129  | 112±128 | 0,941 | 0.0043±0.0033 | 0.0033±0.0016 | 0,283 | 99±99     | 84±76     | 0,902 |
| 64 ctx_lh_S_circular_insula_inf     | 360±280  | 289±352 | 0,613 | 0.0048±0.0026 | 0.0047±0.002  | 0,913 | 209±104   | 320±215   | 0,049 |
| 65 ctx_lh_S_circular_insula_sup     | 274±250  | 259±160 | 0,684 | 0.0049±0.0034 | 0.0037±0.0017 | 0,340 | 191±147   | 141±132   | 0,614 |
| 66 ctx_lh_S_collat_transv_ant       | 164±153  | 216±308 | 0,446 | 0.0049±0.0031 | 0.0042±0.0024 | 0,683 | 199±129   | 235±201   | 0,321 |
| 67 ctx_lh_S_collat_transv_post      | 48±58    | 34±59   | 0,581 | 0.0032±0.0018 | 0.003±0.0018  | 0,908 | 28±36     | 35±57     | 0,546 |
| 68 ctx_lh_S_front_inf               | 166±166  | 183±202 | 0,912 | 0.0091±0.008  | 0.0084±0.0056 | 0,733 | 305±357   | 361±300   | 0,211 |
| 69 ctx_lh_S_front_middle            | 129±132  | 66±116  | 0,115 | 0.0063±0.0041 | 0.0072±0.0037 | 0,501 | 140±100   | 119±83    | 0,280 |
| 70 ctx_lh_S_front_sup               | 235±208  | 306±275 | 0,218 | 0.0109±0.0107 | 0.0085±0.0043 | 0,726 | 381±304   | 487±478   | 0,088 |
| 71 ctx_lh_S_interm_prim-Jensen      | 33±37    | 61±72   | 0,310 | 0.0038±0.003  | 0.0031±0.0021 | 0,452 | 48±54     | 71±110    | 0,436 |
| 72 ctx_lh_S_intrapariet_and_P_trans | 338±223  | 408±299 | 0,451 | 0.0055±0.0024 | 0.0051±0.0028 | 0,962 | 400±206   | 359±292   | 0,718 |
| 73 ctx_lh_S_oc-middle_and_Lunatus   | 183±220  | 99±178  | 0,377 | 0.0034±0.0031 | 0.0039±0.0027 | 0,561 | 138±158   | 96±90     | 0,602 |
| 74 ctx_lh_S_oc_sup_and_transversal  | 434±567  | 293±353 | 0,272 | 0.0041±0.0018 | 0.0036±0.0024 | 0,640 | 224±139   | 120±104   | 0,074 |

ON-LINE FIG 3. Continued



|     |                                  |         |          |       |               |               |       |           |           |       |
|-----|----------------------------------|---------|----------|-------|---------------|---------------|-------|-----------|-----------|-------|
| 75  | ctx_lh_S_occipital_ant           | 54±49   | 63±60    | 0,597 | 0.005±0.0029  | 0.0031±0.0021 | 0,170 | 107±95    | 86±96     | 0,819 |
| 76  | ctx_lh_S_oc-temp_lat             | 144±173 | 193±190  | 0,352 | 0.0046±0.0022 | 0.0039±0.002  | 0,609 | 164±146   | 126±112   | 0,927 |
| 77  | ctx_lh_S_oc-temp_med_and_Lingual | 373±396 | 219±300  | 0,133 | 0.0045±0.0021 | 0.0054±0.0021 | 0,177 | 317±206   | 349±253   | 0,359 |
| 78  | ctx_lh_S_orbital_lateral         | 127±121 | 90±75    | 0,349 | 0.0052±0.0039 | 0.0046±0.002  | 0,982 | 116±146   | 110±90    | 0,784 |
| 79  | ctx_lh_S_orbital_med-olfact      | 214±471 | 141±134  | 0,334 | 0.0036±0.0023 | 0.0024±0.0013 | 0,137 | 87±70     | 29±18     | 0,022 |
| 80  | ctx_lh_S_orbital-H_Shaped        | 147±166 | 71±89    | 0,061 | 0.0048±0.0038 | 0.004±0.002   | 0,446 | 101±96    | 69±50     | 0,273 |
| 81  | ctx_lh_S_parieto_occipital       | 270±308 | 282±191  | 0,978 | 0.0045±0.0023 | 0.0037±0.0015 | 0,659 | 304±228   | 259±222   | 0,918 |
| 82  | ctx_lh_S_pericallosal            | 362±268 | 461±335  | 0,805 | 0.0038±0.0017 | 0.0039±0.0016 | 0,691 | 223±134   | 214±100   | 0,767 |
| 83  | ctx_lh_S_postcentral             | 122±107 | 168±188  | 0,685 | 0.0075±0.0039 | 0.0074±0.0038 | 0,834 | 349±171   | 454±366   | 0,133 |
| 84  | ctx_lh_S_precentral-inf-part     | 94±97   | 60±84    | 0,405 | 0.0065±0.0036 | 0.0072±0.0033 | 0,310 | 138±116   | 173±236   | 0,276 |
| 85  | ctx_lh_S_precentral-sup-part     | 72±89   | 68±101   | 0,751 | 0.0072±0.0058 | 0.0073±0.0033 | 0,795 | 109±110   | 149±118   | 0,194 |
| 86  | ctx_lh_S_suborbital              | 166±152 | 188±154  | 0,436 | 0.003±0.0015  | 0.0036±0.0014 | 0,233 | 80±76     | 132±82    | 0,083 |
| 87  | ctx_lh_S_subparietal             | 229±186 | 260±261  | 0,801 | 0.0036±0.0011 | 0.0036±0.0019 | 0,705 | 225±202   | 198±204   | 0,849 |
| 88  | ctx_lh_S_temporal_inf            | 103±84  | 157±94   | 0,284 | 0.0046±0.0022 | 0.004±0.0014  | 0,622 | 111±79    | 134±106   | 0,525 |
| 89  | ctx_lh_S_temporal_sup            | 372±344 | 330±275  | 0,599 | 0.0072±0.0035 | 0.0064±0.0025 | 0,749 | 657±389   | 622±393   | 0,915 |
| 90  | ctx_lh_S_temporal_transverse     | 85±116  | 91±118   | 0,630 | 0.0036±0.0028 | 0.0025±0.0011 | 0,266 | 59±84     | 38±37     | 0,633 |
| 91  | ctx_rh_G_and_S_frontomargin      | 354±412 | 189±92   | 0,132 | 0.0069±0.004  | 0.0073±0.0037 | 0,522 | 450±250   | 724±569   | 0,038 |
| 92  | ctx_rh_G_and_S_occipital_inf     | 169±184 | 138±105  | 0,328 | 0.0068±0.004  | 0.0053±0.0022 | 0,342 | 430±316   | 295±216   | 0,264 |
| 93  | ctx_rh_G_and_S_paracentral       | 234±208 | 168±129  | 0,516 | 0.0048±0.0025 | 0.0045±0.0016 | 0,939 | 265±201   | 228±294   | 0,981 |
| 94  | ctx_rh_G_and_S_subcentral        | 135±100 | 160±121  | 0,888 | 0.0062±0.0037 | 0.0068±0.0034 | 0,425 | 285±143   | 434±316   | 0,020 |
| 95  | ctx_rh_G_and_S_transv_frontopol  | 340±334 | 270±249  | 0,492 | 0.0084±0.0053 | 0.0072±0.0043 | 0,939 | 716±637   | 516±446   | 0,653 |
| 96  | ctx_rh_G_and_S_cingul-Ant        | 329±237 | 269±244  | 0,928 | 0.0064±0.0038 | 0.0059±0.0028 | 0,854 | 573±408   | 435±244   | 0,478 |
| 97  | ctx_rh_G_and_S_cingul-Mid-Ant    | 395±266 | 325±214  | 0,327 | 0.0053±0.0027 | 0.0056±0.0031 | 0,498 | 431±255   | 418±279   | 0,501 |
| 98  | ctx_rh_G_and_S_cingul-Mid-Post   | 291±310 | 184±149  | 0,182 | 0.0044±0.0015 | 0.0051±0.0028 | 0,229 | 268±95    | 318±289   | 0,284 |
| 99  | ctx_rh_G_cingul-Post-dorsal      | 185±217 | 154±109  | 0,509 | 0.0033±0.0016 | 0.003±0.0016  | 0,802 | 128±63    | 89±72     | 0,294 |
| 100 | ctx_rh_G_cingul-Post-ventral     | 221±301 | 161±183  | 0,862 | 0.0034±0.0023 | 0.0035±0.0019 | 0,867 | 144±129   | 160±120   | 0,596 |
| 101 | ctx_rh_G_cuneus                  | 400±262 | 339±192  | 0,171 | 0.0039±0.0015 | 0.0032±0.0017 | 0,631 | 246±145   | 227±190   | 0,617 |
| 102 | ctx_rh_G_front_inf-Opercular     | 193±154 | 309±270  | 0,266 | 0.0072±0.0054 | 0.0074±0.0043 | 0,876 | 486±322   | 678±620   | 0,153 |
| 103 | ctx_rh_G_front_inf-Orbital       | 80±71   | 212±162  | 0,008 | 0.0043±0.0019 | 0.0042±0.0019 | 0,830 | 115±69    | 185±219   | 0,136 |
| 104 | ctx_rh_G_front_inf-Triangul      | 225±247 | 231±205  | 0,568 | 0.0064±0.0037 | 0.0072±0.0033 | 0,405 | 421±326   | 575±400   | 0,050 |
| 105 | ctx_rh_G_front_middle            | 420±302 | 424±280  | 0,920 | 0.0101±0.0054 | 0.0103±0.0042 | 0,650 | 1711±1379 | 1621±1207 | 0,758 |
| 106 | ctx_rh_G_front_sup               | 837±542 | 1049±620 | 0,511 | 0.0104±0.0057 | 0.0097±0.004  | 0,898 | 3363±2116 | 3687±2334 | 0,293 |
| 107 | ctx_rh_G_Ins_lg_and_S_cent_ins   | 179±121 | 262±255  | 0,586 | 0.004±0.0025  | 0.0045±0.0025 | 0,566 | 117±85    | 182±131   | 0,124 |
| 108 | ctx_rh_G_cingul-short            | 307±148 | 196±180  | 0,035 | 0.0053±0.0035 | 0.0056±0.002  | 0,644 | 296±222   | 350±184   | 0,459 |
| 109 | ctx_rh_G_occipital_middle        | 376±341 | 270±215  | 0,432 | 0.0077±0.0042 | 0.0079±0.0034 | 0,821 | 1094±872  | 979±693   | 0,923 |
| 110 | ctx_rh_G_occipital_sup           | 368±325 | 344±216  | 0,612 | 0.0046±0.0022 | 0.0044±0.0016 | 0,807 | 452±521   | 391±250   | 0,749 |
| 111 | ctx_rh_G_oc-temp_lat-fusiform    | 206±222 | 223±187  | 0,849 | 0.0058±0.0025 | 0.0051±0.0021 | 0,559 | 281±179   | 305±233   | 0,442 |
| 112 | ctx_rh_G_oc-temp_med-Lingual     | 641±416 | 486±303  | 0,226 | 0.0042±0.0012 | 0.004±0.0016  | 0,949 | 431±261   | 310±223   | 0,387 |
| 113 | ctx_rh_G_oc-temp_med-Parahip     | 343±288 | 472±249  | 0,263 | 0.0041±0.0015 | 0.0041±0.0016 | 0,735 | 234±255   | 235±166   | 0,853 |
| 114 | ctx_rh_G_orbital                 | 550±398 | 513±354  | 0,941 | 0.0075±0.0043 | 0.0066±0.0022 | 0,683 | 1014±543  | 786±581   | 0,551 |
| 115 | ctx_rh_G_pariet_inf-Angular      | 254±280 | 185±191  | 0,598 | 0.0099±0.0059 | 0.0102±0.0038 | 0,819 | 1211±855  | 1246±756  | 0,733 |
| 116 | ctx_rh_G_pariet_inf-Supramar     | 156±183 | 82±99    | 0,317 | 0.0105±0.0055 | 0.0106±0.0053 | 0,615 | 1128±684  | 1094±921  | 0,326 |
| 117 | ctx_rh_G_parietal_sup            | 663±460 | 489±346  | 0,501 | 0.0055±0.0033 | 0.0054±0.002  | 0,785 | 631±461   | 646±530   | 0,550 |
| 118 | ctx_rh_G_postcentral             | 473±371 | 363±311  | 0,452 | 0.0069±0.0043 | 0.0083±0.0029 | 0,196 | 638±457   | 861±602   | 0,100 |
| 119 | ctx_rh_G_precentral              | 400±315 | 317±210  | 0,231 | 0.0095±0.0048 | 0.0113±0.0036 | 0,216 | 1460±1051 | 1929±1264 | 0,137 |
| 120 | ctx_rh_G_preuncus                | 480±387 | 788±524  | 0,213 | 0.0054±0.0026 | 0.0051±0.0023 | 0,961 | 664±378   | 775±575   | 0,234 |
| 121 | ctx_rh_G_rectus                  | 230±236 | 328±237  | 0,103 | 0.0034±0.0022 | 0.0033±0.0018 | 0,799 | 89±76     | 143±139   | 0,082 |
| 122 | ctx_rh_G_subcallosal             | 204±148 | 163±148  | 0,818 | 0.0022±0.0009 | 0.0022±0.0018 | 0,518 | 62±49     | 57±60     | 0,647 |
| 123 | ctx_rh_G_temp_sup-G_T_transv     | 164±107 | 117±137  | 0,462 | 0.0035±0.0025 | 0.0034±0.0011 | 0,946 | 75±79     | 54±44     | 0,591 |
| 124 | ctx_rh_G_temp_sup-Lateral        | 672±809 | 245±196  | 0,019 | 0.0069±0.0036 | 0.0082±0.0035 | 0,165 | 711±338   | 900±595   | 0,085 |
| 125 | ctx_rh_G_temp_sup-Plan_polar     | 363±159 | 411±267  | 0,818 | 0.0041±0.0028 | 0.004±0.0017  | 1,000 | 185±142   | 202±116   | 0,531 |
| 126 | ctx_rh_G_temp_sup-Plan_tempo     | 82±76   | 113±184  | 0,663 | 0.0074±0.0051 | 0.0066±0.0036 | 0,938 | 240±184   | 204±178   | 0,968 |
| 127 | ctx_rh_G_temporal_inf            | 218±187 | 257±281  | 0,679 | 0.0083±0.0048 | 0.0071±0.0028 | 0,657 | 850±449   | 785±675   | 0,894 |
| 128 | ctx_rh_G_temporal_middle         | 220±156 | 245±218  | 0,931 | 0.0095±0.0051 | 0.0099±0.0053 | 0,573 | 1537±786  | 1641±1158 | 0,288 |
| 129 | ctx_rh_Lat_Fis-ant-Horizont      | 116±148 | 91±115   | 0,826 | 0.0034±0.0031 | 0.0027±0.0016 | 0,721 | 62±79     | 41±61     | 0,994 |
| 130 | ctx_rh_Lat_Fis-ant-Vertical      | 43±85   | 17±40    | 0,681 | 0.0033±0.0033 | 0.0019±0.0019 | 0,404 | 39±56     | 14±16     | 0,407 |
| 131 | ctx_rh_Lat_Fis-post              | 144±88  | 155±172  | 0,981 | 0.0052±0.0032 | 0.0051±0.0032 | 0,830 | 230±209   | 168±167   | 0,752 |
| 132 | ctx_rh_Pole_occipital            | 506±422 | 392±271  | 0,579 | 0.0057±0.0026 | 0.0049±0.0018 | 0,664 | 638±366   | 474±288   | 0,634 |
| 133 | ctx_rh_Pole_temporal             | 585±374 | 729±489  | 0,731 | 0.007±0.0038  | 0.0065±0.0027 | 0,904 | 918±490   | 1178±788  | 0,184 |
| 134 | ctx_rh_S_calcarine               | 396±221 | 456±195  | 0,606 | 0.0039±0.0012 | 0.0036±0.0014 | 0,989 | 266±134   | 265±204   | 0,539 |
| 135 | ctx_rh_S_central                 | 174±117 | 315±204  | 0,109 | 0.0055±0.0039 | 0.0061±0.0033 | 0,734 | 232±171   | 257±191   | 0,567 |
| 136 | ctx_rh_S_cingul-Marginalis       | 177±184 | 156±177  | 0,961 | 0.0045±0.0023 | 0.0046±0.0024 | 0,664 | 197±146   | 213±197   | 0,432 |
| 137 | ctx_rh_S_circular_insula_ant     | 135±146 | 26±24    | 0,059 | 0.0043±0.0037 | 0.0042±0.0029 | 0,861 | 101±103   | 77±85     | 0,420 |
| 138 | ctx_rh_S_circular_insula_inf     | 217±132 | 413±271  | 0,063 | 0.0052±0.0029 | 0.005±0.0018  | 0,797 | 269±138   | 346±148   | 0,137 |
| 139 | ctx_rh_S_circular_insula_sup     | 191±129 | 137±110  | 0,344 | 0.0037±0.002  | 0.0038±0.0015 | 0,852 | 93±52     | 92±88     | 0,803 |
| 140 | ctx_rh_S_collat_transv_ant       | 75±85   | 211±411  | 0,097 | 0.0054±0.0034 | 0.0038±0.0018 | 0,188 | 138±81    | 158±158   | 0,471 |
| 141 | ctx_rh_S_collat_transv_post      | 83±109  | 81±93    | 0,589 | 0.0037±0.0037 | 0.0029±0.0015 | 0,642 | 51±51     | 45±38     | 0,865 |
| 142 | ctx_rh_S_front_inf               | 186±150 | 184±147  | 0,866 | 0.006±0.0033  | 0.0057±0.0022 | 0,967 | 300±283   | 232±243   | 0,960 |
| 143 | ctx_rh_S_front_middle            | 210±229 | 272±224  | 0,278 | 0.0082±0.0069 | 0.007±0.0041  | 0,990 | 316±275   | 342±407   | 0,175 |
| 144 | ctx_rh_S_front_sup               | 222±211 | 278±246  | 0,635 | 0.0082±0.0053 | 0.0081±0.0064 | 0,719 | 326±201   | 308±237   | 0,679 |

ON-LINE FIG 3. Continued



|                                      |         |         |       |               |               |       |          |          |       |
|--------------------------------------|---------|---------|-------|---------------|---------------|-------|----------|----------|-------|
| 145 ctx_rh_S_interm_prim-Jensen      | 41±54   | 27±34   | 0,640 | 0.0044±0.0019 | 0.0047±0.0027 | 0,305 | 66±101   | 80±113   | 0,466 |
| 146 ctx_rh_S_intrapariet_and_P_trans | 298±242 | 365±275 | 0,866 | 0.0059±0.0044 | 0.0058±0.003  | 0,994 | 1389±353 | 399±241  | 0,630 |
| 147 ctx_rh_S_oc_middle_and_Lunatus   | 129±204 | 79±123  | 0,432 | 0.0028±0.0017 | 0.0031±0.0026 | 0,514 | 71±74    | 79±97    | 0,530 |
| 148 ctx_rh_S_oc_sup_and_transversal  | 239±194 | 232±241 | 0,894 | 0.0037±0.0022 | 0.0041±0.0022 | 0,646 | 100±63   | 155±118  | 0,155 |
| 149 ctx_rh_S_occipital_ant           | 218±270 | 110±109 | 0,456 | 0.0047±0.0023 | 0.0045±0.0012 | 0,948 | 107±90   | 114±68   | 0,398 |
| 150 ctx_rh_S_oc-temp_lat             | 45±67   | 90±213  | 0,341 | 0.0053±0.0031 | 0.0059±0.0059 | 0,839 | 92±72    | 90±49    | 0,709 |
| 151 ctx_rh_S_oc-temp_med_and_Lingual | 190±186 | 395±336 | 0,018 | 0.0043±0.002  | 0.0042±0.0014 | 0,816 | 175±131  | 303±272  | 0,006 |
| 152 ctx_rh_S_orbital_lateral         | 101±124 | 125±138 | 0,678 | 0.0042±0.0038 | 0.0038±0.0009 | 0,875 | 83±91    | 85±75    | 0,832 |
| 153 ctx_rh_S_orbital_med-olfact      | 176±201 | 236±293 | 0,392 | 0.003±0.002   | 0.0028±0.0015 | 0,905 | 75±50    | 68±58    | 0,952 |
| 154 ctx_rh_S_orbital-H_Shaped        | 172±226 | 106±106 | 0,304 | 0.0053±0.0028 | 0.0048±0.0038 | 0,818 | 257±356  | 87±67    | 0,218 |
| 155 ctx_rh_S_parieto_occipital       | 429±272 | 463±421 | 0,404 | 0.0041±0.0018 | 0.0039±0.0021 | 0,863 | 345±245  | 304±193  | 0,715 |
| 156 ctx_rh_S_pericallosal            | 657±479 | 701±301 | 0,854 | 0.0046±0.0027 | 0.0046±0.0019 | 0,858 | 452±395  | 525±434  | 0,538 |
| 157 ctx_rh_S_postcentral             | 283±259 | 266±358 | 0,980 | 0.0046±0.0021 | 0.0062±0.0028 | 0,105 | 204±136  | 255±131  | 0,291 |
| 158 ctx_rh_S_precentral-inf-part     | 73±89   | 115±108 | 0,105 | 0.0062±0.0036 | 0.0062±0.0026 | 0,898 | 184±168  | 219±203  | 0,135 |
| 159 ctx_rh_S_precentral-sup-part     | 79±94   | 122±102 | 0,202 | 0.0065±0.0044 | 0.0066±0.0031 | 0,966 | 152±112  | 150±112  | 0,785 |
| 160 ctx_rh_S_suborbital              | 72±123  | 67±75   | 0,605 | 0.0024±0.0016 | 0.0024±0.0015 | 0,766 | 37±38    | 35±42    | 0,838 |
| 161 ctx_rh_S_subparietal             | 183±151 | 357±399 | 0,352 | 0.0037±0.0027 | 0.0041±0.0026 | 0,625 | 165±138  | 224±226  | 0,204 |
| 162 ctx_rh_S_temporal_inf            | 240±273 | 180±188 | 0,455 | 0.0054±0.0045 | 0.0046±0.0018 | 0,875 | 209±198  | 192±201  | 0,655 |
| 163 ctx_rh_S_temporal_sup            | 346±229 | 462±432 | 0,868 | 0.0087±0.0048 | 0.0085±0.0042 | 0,799 | 813±374  | 1006±634 | 0,079 |
| 164 ctx_rh_S_temporal_transverse     | 64±51   | 67±73   | 0,659 | 0.0036±0.0028 | 0.0031±0.001  | 0,628 | 50±43    | 48±64    | 0,934 |

ON-LINE FIG 3. Continued

On-line Table: Description of the graph theoretical properties used in this study

| Degree                     | The Number of Adjacent Nodes, ie, Neighbors of the Node                                                                                                                                       |
|----------------------------|-----------------------------------------------------------------------------------------------------------------------------------------------------------------------------------------------|
| Strength                   | Total number of streamlines connected from a node to all other nodes                                                                                                                          |
| Clustering coefficient     | Fraction of the neighbors of a node connected to each other and, thus, forming a triangle                                                                                                     |
| Characteristic path length | Average of the shortest path lengths between each pair of nodes in the network                                                                                                                |
| Global efficiency          | Average of the inverse shortest path lengths and is influenced more by short paths, whereas long paths primarily influence the characteristic path length.                                    |
| Local efficiency           | Efficiency of a subgraph formed by the neighborhood of the node                                                                                                                               |
| Betweenness centrality     | Measures the centrality of the node in the network and is affected by the fraction of the shortest paths passing through the node                                                             |
| Small-worldness            | Small-world networks contain both specialized modules and integrating edges; small-worldness is calculated as the ratio between the clustering coefficient and the characteristic path length |
